# Supplementary material for: Comparative studies on the electrochemical and optical properties of representative benzo[1,2-c;4,5-c′]bis[1,2,5]thiadiazole, [1,2,5]-thiadiazolo[3,4-g]quinoxaline and pyrazino[2,3-g]quinoxaline derivatives
Source: Royal Society of Chemistry journal article supplement (doi:10.1039/c2tc00212d), 2013-01-01
Supplement: c2tc00212d.pdf [file c2tc00212d.pdf]

## Comparative studies on the electronic properties of the representative benzo[1,2-c;4,5-c']bis[1,2,5]thiadiazole, [1,2,5]-thiadiazolo[3,4-g]quinoxaline and pyrazino[2,3-g]quinoxaline derivatives

Hairong Li, Feng Zhou, Teck Lip Dexter Tam, Yeng Ming Lam, Subodh G. Mhaisalkar, Haibin Su\* and Andrew C. Grimsdale\*

*School of Materials Science and Engineering, Nanyang Technological University, 50 Nanyang Avenue, 639798 Singapore.*

*Energy Research Institute @ NTU (ERI@N), 50 Nanyang Drive, 637553 Singapore.*

\*Corresponding Author. Email: [HBSu@ntu.edu.sg](mailto:HBSu@ntu.edu.sg), [ACGrimsdale@ntu.edu.sg](mailto:ACGrimsdale@ntu.edu.sg)

### Experimental Details

**Materials and Equipments.** All reagents were purchased from Sigma-Aldrich and used without further purification, unless otherwise stated. Column chromatography was carried out with Merck silica (230 – 400 mesh) while thin layer chromatography (TLC) were performed on Merck silica 60 Al-backed plates (20 cm × 20 cm). <sup>1</sup>H and <sup>13</sup>C NMR data were obtained on a Bruker DPX 400 MHz spectrometer with chemical shifts referenced to CDCl<sub>3</sub>. Matrix assisted laser desorption/ionization time-of-flight (MALDI-TOF) mass spectra were obtained on a Shimadzu Biotech AXIMA-TOF<sup>2</sup>. Elemental analysis was obtained via a Thermo Scientific Flash 2000 Series CHNS/O Analyzer. UV-Vis absorption spectra were recorded on a Lambda 900 Spectrometer from Perkin Elmer. Emission spectra were recorded on a RF-5301 Spectrofluorophotometer. Cyclic voltammetry experiments were

performed using a Multichannel Potentiostat (Model 1470E) from Solartron Analytical. All CV measurements were recorded in dichloromethane (DCM) with 0.1 M tetrabutylammonium hexafluorophosphate as supporting electrolyte (scan rate of  $100 \text{ mV}\cdot\text{s}^{-1}$ ). The experiments were performed at room temperature with a conventional three electrodes configuration consisting of a platinum wire working electrode, a gold counter electrode, and an Ag/AgCl in 3 M KCl reference electrode. The measured potentials were converted to orbital energies by using value of SCE (saturated calomel electrode) having potential of -4.4 eV relative to vacuum.

**Calculation Method.** Atomistic simulation, using density function theory (DFT) at B3LYP [1,2] and TD-B3LYP (which includes the gradient corrected exchange and correlation functionals along with the exact exchange) method with double- $\zeta$  quality basis functions 6-31G\* (augmented with polarized function for all non-hydrogen atoms), was used to optimize the geometry of all the molecules. Geometry was fully relaxed and no symmetry constraints were imposed during optimization using Gaussian 09 code [3] with a convergence criterion of  $10^{-3}$  a.u. on the gradient and displacement and  $10^{-6}$  a.u on energy and electron density. Harmonic vibrational analyses showed no imaginary frequency, indicating these structures are a local minimum.

**4,7-Dihexylbenzo[*c*][1,2,5]thiadiazole-5,6-diamine (2).** Compound **1** (0.5 g, 1.54 mmol), *n*-hexylboronic acid (0.6 g, 4.62 mmol), Pd(dppf)Cl<sub>2</sub> (0.1g, 0.12 mmol), dioxane (30 ml) and CsCO<sub>3</sub> (2M aq, 20 ml) were added to a one neck round bottom flask purged with N<sub>2</sub> gas, the mixture were stirred at 60 °C for 1 d, cooled down and poured into water, then extracted with dichloromethane (DCM). The organic layer was collected, dried over anhydrous MgSO<sub>4</sub>, and concentrated. The residue was recrystallized from methanol and used immediately without further purification due to its gradual decomposition in air.

**4,7-Dihexylbenzo[1,2-*c*;4,5-*c'*]bis[1,2,5]thiadiazole (BBT-X1).** *N*-thionylaniline (0.33 g, 2.39 mmol) was added dropwise to a solution of compound **2** (0.2 g, 0.60 mmol) in chloroform (15 ml) in a flask purged with N<sub>2</sub>, followed by slow addition of TMSCl (0.26 g, 2.39 mmol) and pyridine (0.19 g, 2.39 mmol) at room temperature. The mixture was heated to reflux for 1 d, cooled down and poured into water, then extracted with DCM. The organic layer was collected, dried over anhydrous MgSO<sub>4</sub> and concentrated. The residue was purified by chromatography, eluting with hexane/DCM (1/1) to yield 90 mg of a dark red solid (33% yield calculated from compound **1**). <sup>1</sup>H NMR (CDCl<sub>3</sub>, δ ppm): 2.96 (t, 4 H, J = 7.6, PhCH<sub>2</sub>), 1.65 (quintet, 4 H, J = 7.6 Hz, PhCH<sub>2</sub>CH<sub>2</sub>), 1.25-1.36 (m, 12 H, CH<sub>2</sub>), 0.87 (t, 6 H, J = 6.8 Hz, CH<sub>3</sub>). <sup>13</sup>C NMR (CDCl<sub>3</sub>, δ ppm): 156.1, 134.7, 31.52, 29.51, 28.79, 28.60, 22.56, 14.07. MALDI-TOF-MS *m/z*: 362.1578 (M<sup>+</sup>); calcd for C<sub>18</sub>H<sub>26</sub>N<sub>4</sub>S<sub>2</sub>: 362.1599. Anal calcd for C<sub>18</sub>H<sub>26</sub>N<sub>4</sub>S<sub>2</sub>: C, 59.63; H, 7.23; N, 15.45; S, 17.69; found: 59.46; H, 7.27; N, 15.86; S, 17.44.

**4,7-Dihexyl-[1,2,5]selenadiazolo[3,4-f]-2,1,3-benzothiadiazole (SBT-X1).** A mixture of compound **2** (0.2 g, 0.60 mmol) and SeO<sub>2</sub> (66 mg, 0.60 mmol) in EtOH (20 ml) was refluxed for 2 d. The cooled mixture was filtered, and the crude solid was eluted through silica with DCM to afford a dark purple solid (145 mg, 46 % calculated from compound **1**). <sup>1</sup>H NMR (CDCl<sub>3</sub>, δ ppm): 3.08 (t, 4H, J = 8 Hz, PhCH<sub>2</sub>), 1.79 (quintet, 4 H, J = 7.6 Hz, PhCH<sub>2</sub>CH<sub>2</sub>), 1.31-1.33 (m, 12H, CH<sub>2</sub>), 0.89 (t, 6H, J = 7.6 Hz, CH<sub>3</sub>). <sup>13</sup>C NMR (CDCl<sub>3</sub>, δ ppm): 158.5, 155.8, 134.1, 32.8, 32.3, 30.3, 29.9, 23.3, 14.7. MALDI-TOF-MS m/z: 410.0904 (M<sup>+</sup>); calcd for C<sub>18</sub>H<sub>26</sub>N<sub>4</sub>SSe: 410.1043. Anal calcd for C<sub>18</sub>H<sub>26</sub>N<sub>4</sub>SSe: C, 52.80; H, 6.40; N, 13.68; S, 7.83; found: C, 52.66; H, 6.49; N, 13.93, S, 7.96.

**5,6-Dinitrobenzo[c][1,2,5]thiadiazole (4).** N-thionylaniline (5.57 g, 40.0 mmol) was added dropwise into the suspension of compound **3** (2 g, 10.0 mmol) in chloroform(50 ml) in a flask purged with N<sub>2</sub>, followed by slow addition of TMSCl (4.34 g, 40.0 mmol) and pyridine (3.16 g, 40.0 mmol) at room temperature. The whole solution was then heated to reflux for 1 d, cooled, poured into water, and then extracted with DCM. The organic layer was collected, dried over anhydrous MgSO<sub>4</sub> and concentrated. The crude product was recrystallized from a mixture of hexane with 10% of ethyl acetate to afford pale yellow crystals (1.47 g, 65 %). <sup>1</sup>H NMR (CDCl<sub>3</sub>, δ ppm): 9.22 (s, 2H). <sup>13</sup>C NMR (CDCl<sub>3</sub>, δ ppm): 171.7, 152.0, 110.9. Anal calcd for C<sub>6</sub>H<sub>2</sub>N<sub>4</sub>O<sub>4</sub>S: C, 31.86; H, 0.89; N, 24.77; S, 14.18; found: C, 31.65; H, 0.92; N, 25.01, S, 14.36.

**3,6-Bis(3,5-di-tert-butylphenyl)phenanthrene-9,10-dione (6).** Compound **5** (2 g, 5.46 mmol) and 3,5-di-tert-butylphenylboronic acid (2.81 g, 12.0 mmol), Pd(PPh<sub>3</sub>)<sub>4</sub> (0.38 g, 0.33 mmol), toluene (40 ml) and K<sub>2</sub>CO<sub>3</sub> (2M aq, 30 ml) were added to a one neck round bottom flask purged with N<sub>2</sub>, the mixture was stirred at 85 °C for 1 d, cooled, poured into water, and then extracted with DCM. The organic layer was collected, dried over anhydrous MgSO<sub>4</sub> and concentrated. The crude was purified by chromatography, eluted with hexane/DCM (2/3) to afford yellow fluffy crystals (2.80 g, 88 %). <sup>1</sup>H NMR (CDCl<sub>3</sub>, δ ppm): 8.30 (d, 2H, J = 7.6 Hz, Phenan-**H**), 8.29 (d, 2H, J = 7.6 Hz, Phenan-**H**), 7.72 (dd, 2H, J = 8 Hz, Phenan-**H**), 7.56 (s, 2H, Ph**H**), 7.54 (s, 4H, Ph**H**), 1.41 (s, 36H, CH<sub>3</sub>). <sup>13</sup>C NMR (CDCl<sub>3</sub>, δ ppm): 180.9, 152.5, 150.5, 139.6, 136.8, 131.8, 130.4, 129.1, 123.9, 123.5, 122.3, 35.7, 32.1. MALDI-TOF-MS m/z: 584.70 (M<sup>+</sup>); calcd for C<sub>42</sub>H<sub>48</sub>O<sub>2</sub>: 584.37. Anal calcd for C<sub>42</sub>H<sub>48</sub>O<sub>2</sub>: C, 86.26; H, 8.27; found: C, 86.02; H, 8.29.

**4,7-Bis(thien-2'-yl)-[1,2,5]selenadiazolo[3,4-f]-2,1,3-benzothiadiazole (SBT-X2).** A mixture of compound **8** (0.2 g, 0.61 mmol) and SeO<sub>2</sub> (67 mg, 0.61 mmol) in EtOH (20 ml) was refluxed for 1 d. The cooled mixture was filtered, and the crude solid was quickly filtered through silica with DCM to afford a dark purple solid with 53 % yield (130 mg). <sup>1</sup>H NMR (CDCl<sub>3</sub>, δ ppm): 9.01 (dd, 2H, J = 4.8 Hz, Th**H**), 7.71 (d, 2H, J = 4.8 Hz, Th**H**), 7.33 (quartet, 2H, J = 4.8 Hz, Th**H**). MALDI-TOF-MS m/z: 405.9018 (M<sup>+</sup>); calcd. for C<sub>14</sub>H<sub>6</sub>N<sub>4</sub>S<sub>3</sub>Se: 405.8920. Anal calcd for C<sub>14</sub>H<sub>6</sub>N<sub>4</sub>S<sub>3</sub>Se: C, 41.48; H, 1.49; N, 13.82; S, 23.73; found: C, 41.27; H, 1.45; N, 14.10; S, 23.51.

**6,7-Bis(4'-butoxy-1',4-biphen-1-yl)-[1,2,5]thiadiazolo[3,4-g]quinoxaline (TQ-X0).** Compound **4** (0.3 g, 1.33 mmol) and iron powder (1.48 g, 26.5 mmol) were suspended in acetic acid (30 ml) and the mixture was stirred at 60 °C for 6 hr under N<sub>2</sub> to form intermediate **7**. The excess iron powder was removed using magnetic bar, followed by addition of 1,2-bis(4'-butoxy-1',4-biphen-1-yl)-ethanedione (**9**) (0.67 g, 1.33 mmol) in one portion. The reaction was stirred at 80 °C for 2 d, then poured into water and extracted with DCM. The organic layer was collected, dried over anhydrous MgSO<sub>4</sub> and concentrated. The crude was purified by chromatography, eluted with hexane/DCM (1/2) to obtain red brown solid (0.60 g, 72 %). <sup>1</sup>H NMR (CDCl<sub>3</sub>, δ ppm): 9.02 (s, 2H, PhH), 7.74 (d, 4H, J = 8.4 Hz, BiPhH), 7.61 (d, 4H, J = 8.4 Hz, BiPhH), 7.58 (d, 4H, J = 8.4 Hz, BiPhH), 6.98 (d, 4H, J = 8.4 Hz, BiPhH), 4.02 (t, 4H, J = 6.4 Hz, OCH<sub>2</sub>), 1.80 (quintet, 4H, J = 6.8 Hz, OCH<sub>2</sub>CH<sub>2</sub>), 1.51 (m, 4H, CH<sub>2</sub>CH<sub>3</sub>), 0.99 (t, 6H, J = 7.2 Hz, CH<sub>3</sub>). <sup>13</sup>C NMR (CDCl<sub>3</sub>, δ ppm): 160.0, 156.3, 153.0, 143.5, 138.8, 136.4, 132.8, 131.5, 128.8, 127.2, 115.6, 114.6, 68.5, 32.0, 19.9, 14.5. MALDI-TOF-MS m/z: 636.2851 (M<sup>+</sup>); calcd for C<sub>40</sub>H<sub>36</sub>N<sub>4</sub>O<sub>2</sub>S<sub>2</sub>: 636.2559. Anal calcd for C<sub>40</sub>H<sub>36</sub>N<sub>4</sub>O<sub>2</sub>S<sub>2</sub>: C, 75.44; H, 5.70; N, 8.80; S, 5.04; found: 75.36; H, 5.72; N, 8.96; S, 5.14.

**3,6-Bis(3,5-di-tert-butylphenyl)phenanthrene)-[1,2,5]thiadiazolo[3,4-g]quinoxaline (TQ-Y0).**

**TQ-Y0** was prepared as **TQ-X0** above, substituting compound **6** for compound **9** to give an orange solid with yield of 75 %. <sup>1</sup>H NMR (CDCl<sub>3</sub>, δ ppm): 9.28 (d, 2H, J = 8.4 Hz, Phenan-H), 8.81 (s, 2H, core-PhH), 8.47 (s, 2H, Phenan-H), 8.00 (dd, 2H, J = 8.0 Hz, Phenan-H), 7.71 (s, 4H, PhH), 7.57 (s,

2H, PhH), 1.47 (s, 36H, CH<sub>3</sub>). <sup>13</sup>C NMR (CDCl<sub>3</sub>, δ ppm): 152.6, 152.4, 146.8, 146.6, 140.3, 139.4, 134.1, 129.2, 128.8, 123.3, 122.6, 122.5, 114.4, 35.8, 32.2. MALDI-TOF-MS m/z: 714.3809 (M<sup>+</sup>); calcd for C<sub>48</sub>H<sub>50</sub>N<sub>4</sub>S: 714.3756. Anal calcd for C<sub>48</sub>H<sub>50</sub>N<sub>4</sub>S: C, 80.63; H, 7.05; N, 7.84; S, 4.48; found: 80.51; H, 7.09; N, 7.98; S, 4.36.

**Bis[(3,6-bis(3,5-di-tert-butylphenyl)phenanthrene)]-pyrazino[2,3-g]quinoxaline (PQ-Y0).** A mixture of compound **10** (120 mg, 0.42 mmol) and compound **6** (494 mg, 0.84 mmol) was added to a round bottom flask containing glacial acetic acid (25 ml). The reaction was stirred at 130 °C for 2 d. The reaction mixture was cooled down and poured into water, filtered and the solids were washed with water and ethanol. Column chromatography was carried out using hexane/DCM (1/1) to obtain a red solid (340 mg, 65 % yield). <sup>1</sup>H NMR (CDCl<sub>3</sub>, δ ppm): 9.66 (d, 4H, J = 8.4 Hz, Phenan-H), 9.62 (s, 2H, core-PhH), 8.82 (s, 4H, Phenan-H), 8.15 (d, 4H, J = 8.4 Hz, Phenan-H), 7.88 (s, 8H, PhH), 7.66 (s, 4H, PhH), 1.48 (s, 72H, CH<sub>3</sub>). <sup>13</sup>C NMR (CDCl<sub>3</sub>, δ ppm): 156.6, 152.3, 146.5, 145.4, 142.2, 140.6, 134.0, 129.2, 128.6, 128.5, 122.7, 122.6, 121.9, 35.8, 32.2. MALDI-TOF-MS m/z: 1237.8221 (M<sup>+</sup>); calcd for C<sub>90</sub>H<sub>100</sub>N<sub>4</sub>: 1237.7982. Anal calcd for C<sub>90</sub>H<sub>100</sub>N<sub>4</sub>: C, 87.33; H, 8.14; N, 4.53; found: 87.08; H, 8.19; N, 4.65.

**4,7-Bis(5'-hexylthien-2'-yl)-benzo[1,2-c;4,5-c']bis[1,2,5]thiadiazole (13).** Compound **11** (0.4 g, 1.14 mmol), compound **12** (1.30 g, 2.84 mmol) and Pd[PPh<sub>3</sub>]<sub>2</sub>Cl<sub>2</sub> (48 mg, 0.068 mmol) were added to

a round bottom flask purged with N<sub>2</sub>, followed by injection of anhydrous THF (40 ml). The reaction was stirred under reflux for 2 d. The cooled mixture was poured into water, and extracted with DCM. The organic layer was collected, dried over anhydrous MgSO<sub>4</sub> and concentrated. The residue was purified by chromatography, eluting with hexane/DCM (1/1) to obtain a dark blue solid (0.5 g, 84 %).

<sup>1</sup>H NMR (CDCl<sub>3</sub>, δ ppm): 8.70 (d, 2H, J = 4 Hz, ThH), 6.95 (d, 2H, J = 4 Hz, ThH), 2.94 (t, 4H, J = 7.6 Hz, ThCH<sub>2</sub>), 1.81 (quintet, 4H, ThCH<sub>2</sub>CH<sub>2</sub>), 1.34-1.49 (m, 12H, CH<sub>2</sub>), 0.92 (t, 6H, J = 7.2 Hz, CH<sub>3</sub>).

<sup>13</sup>C NMR (CDCl<sub>3</sub>, δ ppm): 152.6, 151.5, 136.0, 133.4, 126.1, 113.8, 32.3, 32.2, 31.1, 29.6, 23.3, 14.8.

MALDI-TOF-MS m/z: 526.1285 (M<sup>+</sup>); calcd for C<sub>26</sub>H<sub>30</sub>N<sub>4</sub>S<sub>4</sub>: 526.1353. Anal calcd for C<sub>26</sub>H<sub>30</sub>N<sub>4</sub>S<sub>4</sub>: C, 59.28; H, 5.74; N, 10.64; S, 24.35; found: 59.10; H, 5.85; N, 10.89; S, 24.12.

**3,6-Bis(3,5-di-tert-butylphenyl)phenanthrene)-4,7-bis(5'-hexylthien-2'-yl)-[1,2,5]thiadiazolo [3,4-g]quinoxaline (TQ-Y2).** Compound **13** (0.2 g, 0.38 mmol) and iron powder (0.42 g, 7.60 mmol) were suspended in glacial acetic acid (20 ml) and the mixture was stirred at 60 °C for 6 hr to form intermediate **14**, excess iron was removed using a magnetic bar, followed by addition of compound **6** (0.22 g, 0.38 mmol) in one portion. The reaction was stirred at 80 °C for 2 d, poured into water, and extracted with DCM. The organic layer was collected, dried over anhydrous MgSO<sub>4</sub> and concentrated. The residue was purified by chromatography, eluting with hexane/DCM (3/1) to obtain a greenish or dark brown (colour depended on the molecular packing during drying) solid (0.26 g, 65 %).

<sup>1</sup>H NMR (CDCl<sub>3</sub>, δ ppm): 9.43 (d, 2H, J = 8 Hz, Phenan-H), 8.73 (d, 2H, J = 4 Hz, ThH), 8.69 (s, 2H, Phenan-



**H**), 7.91 (dd, 2H, J = 8 Hz, Phenan-**H**), 7.71 (s, 4H, Ph**H**), 7.58 (s, 2H, Ph**H**), 6.95 (d, 2H, J = 4 Hz, Th**H**), 3.00 (t, 4H, J = 7.6 Hz, ThCH<sub>2</sub>CH<sub>2</sub>), 1.88 (quintet, 4H, ThCH<sub>2</sub>CH<sub>2</sub>), 1.40-1.49 (m, 48H, CH<sub>2</sub> and t-Bu-CH<sub>3</sub>), 0.92 (t, 6H, J = 7.2 Hz, CH<sub>3</sub>). <sup>13</sup>C NMR (CDCl<sub>3</sub>, δ ppm): 152.5, 152.2, 151.9, 145.4, 144.1, 140.7, 136.4, 134.5, 134.1, 133.9, 130.1, 128.0, 125.0, 123., 122.6, 122.3, 121.3, 35.8, 32.4, 32.3, 31.0, 29.7, 23.3, 14.8. MALDI-TOF-MS m/z: 1046.5865 (M<sup>+</sup>); calcd for C<sub>68</sub>H<sub>78</sub>N<sub>4</sub>S<sub>3</sub>: 1046.5389. Anal calcd for C<sub>68</sub>H<sub>78</sub>N<sub>4</sub>S<sub>3</sub>: C, 77.96; H, 7.50; N, 5.35; S, 9.18; found: 77.75; H, 7.57; N, 5.52; S, 9.09.

**Bis[(3,6-bis(3,5-di-tert-butylphenyl)phenanthrene)]-4,7-bis(5'-hexylthien-2'-yl)-pyrazino[2,3-g]quinoxaline (PQ-Y2).** Compound **13** (0.2 g, 0.38 mmol) and zinc powder (0.74 g, 11.4 mmol) were suspended in glacial acetic acid (20 ml) and the mixture was stirred at 90 °C for 12 hr to form intermediate **15** (whereas iron can be retrieved by a magnetic bar, the reaction for 12 hr to consume all excess zinc in the acid was required because could zinc can further reduce the later formed **PQ-Y2**), followed by addition of compound **6** (0.44 g, 0.76 mmol) in one portion. The reaction was stirred at 50 °C for 4 d, poured into water, and extracted with DCM. The organic layer was collected, dried over anhydrous MgSO<sub>4</sub> and concentrated. The residue was purified by chromatography, eluting with hexane/DCM (3/1) to obtain a purple red solid (0.22 g, 37 %). 9.54 (d, 4H, J = 8 Hz, Phenan-**H**), 8.85 (s, 4H, J = 4 Hz, 2H, Phenan-**H**), 8.50 (d, 2H, J = 4 Hz, Th**H**), 8.07 (d, 4H, J = 8.4 Hz, Phenan-**H**), 7.72 (s, 8H, Ph**H**), 7.71 (dd, 2H, J = 4H, Th**H**), 7.57 (s, 4H, Ph**H**), 3.20 (t, 4H, J = 7.6 Hz, ThCH<sub>2</sub>CH<sub>2</sub>), 2.05 (quintet, 4H, ThCH<sub>2</sub>CH<sub>2</sub>), 1.67 (quintet, 4H, CH<sub>2</sub>), 1.47 (s, 72H, t-Bu-CH<sub>3</sub>), 1.25-1.42 (m, 8H,

**CH<sub>2</sub>**), 0.96 (t, 6H, J = 7.2 Hz, **CH<sub>3</sub>**). <sup>13</sup>C NMR (CDCl<sub>3</sub>, δ ppm): 163.8, 152.3, 145.4, 143.7, 140.8, 138.4, 135.4, 133.9, 133.8, 131.5, 130.7, 130.4, 129.4, 129.3, 128.3, 124.7, 122.9, 122.6, 35.8, 32.7, 32.5, 32.2, 29.7, 23.3, 14.8. MALDI-TOF-MS m/z: 1569.8923 (M<sup>+</sup>); calcd for C<sub>110</sub>H<sub>128</sub>N<sub>4</sub>S<sub>2</sub>: 1569.9614. Anal calcd for C<sub>110</sub>H<sub>128</sub>N<sub>4</sub>S<sub>2</sub>: C, 84.13; H, 8.22; N, 3.57; S, 4.08; found: 83.89; H, 8.31; N, 3.72; S, 3.90.

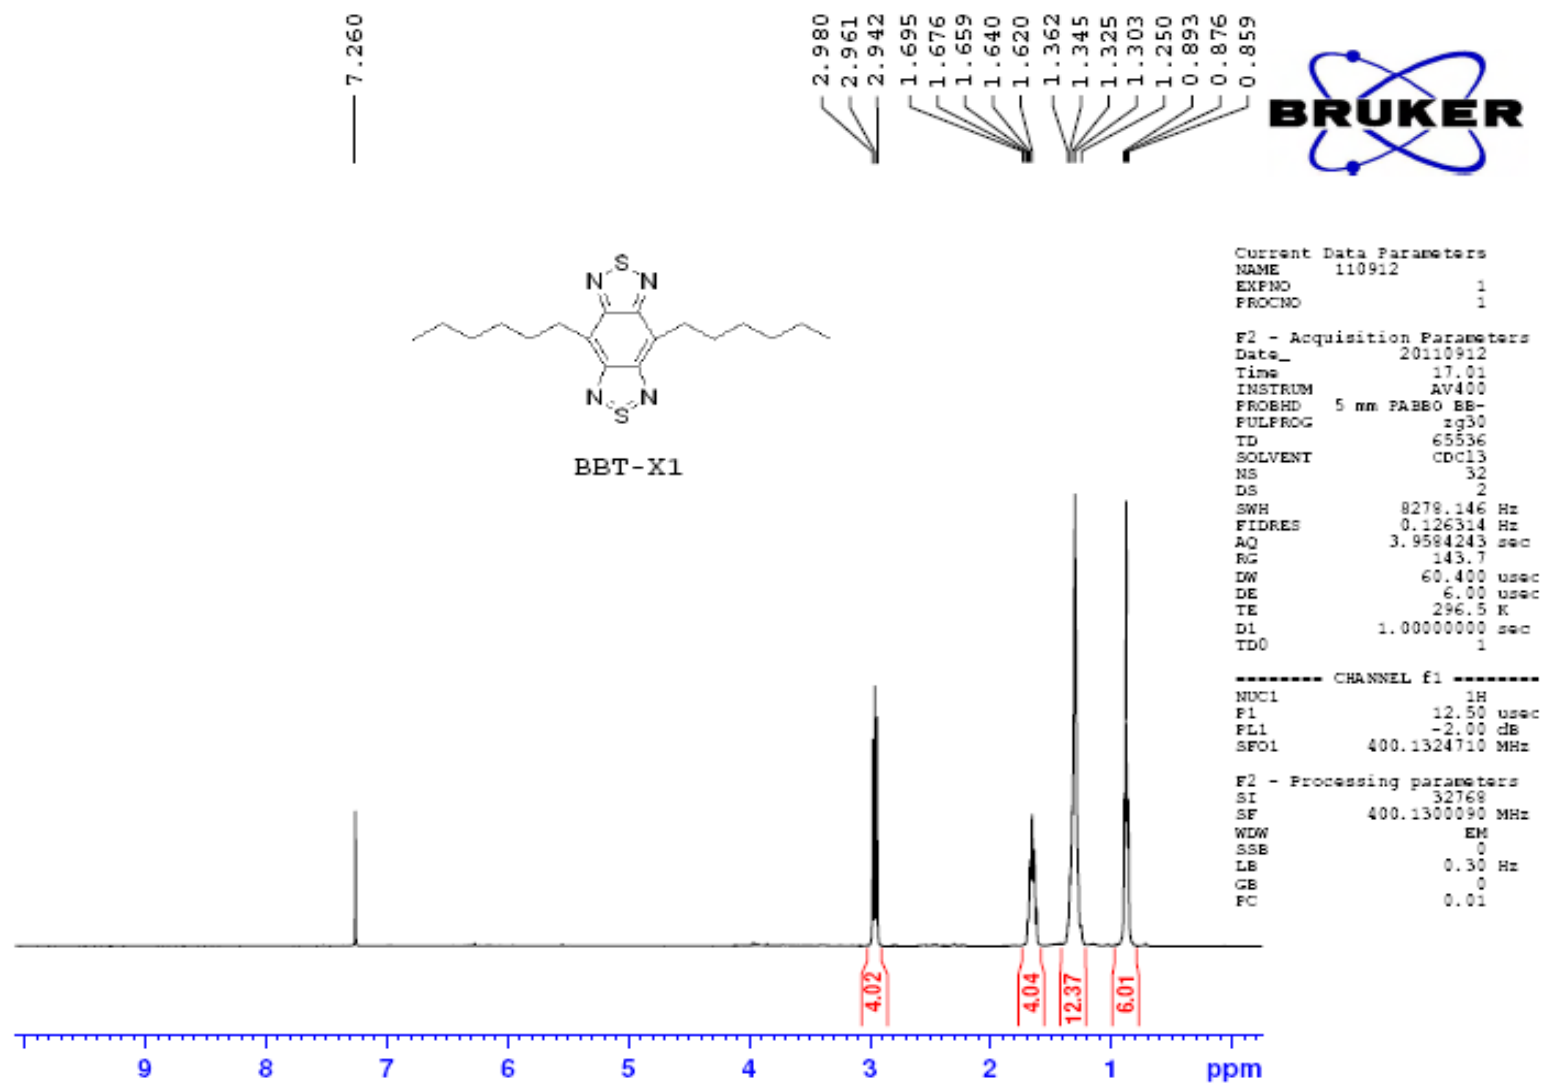

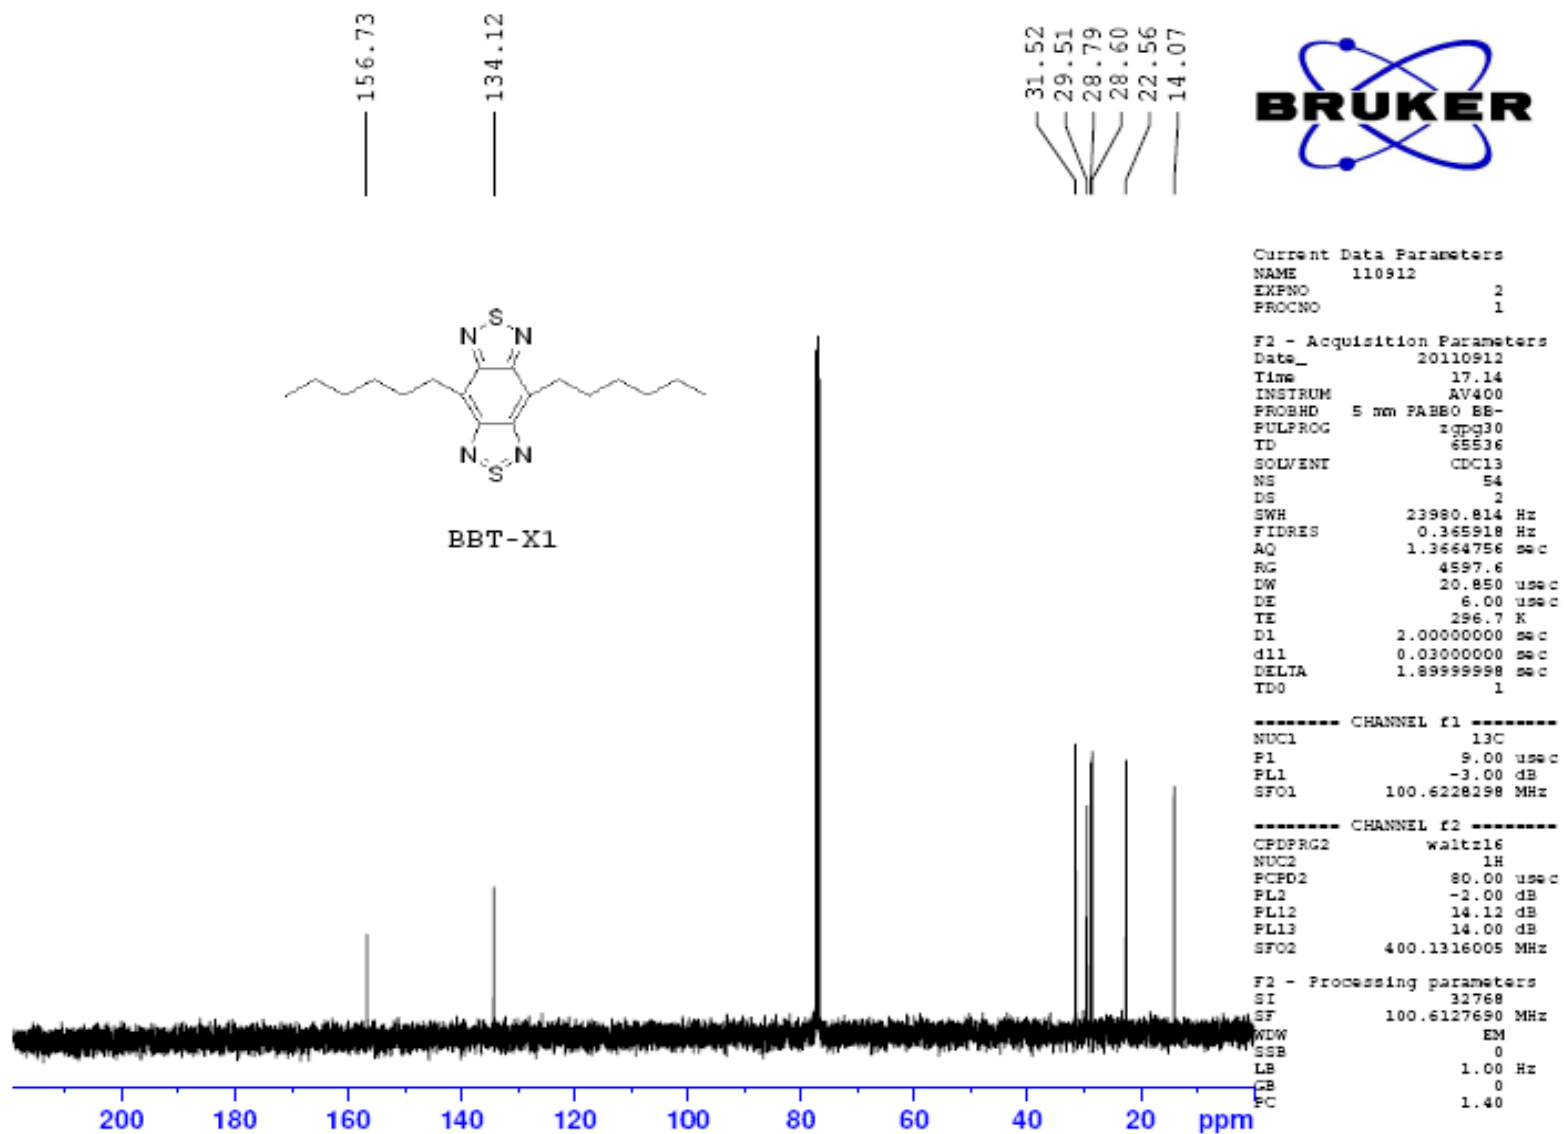

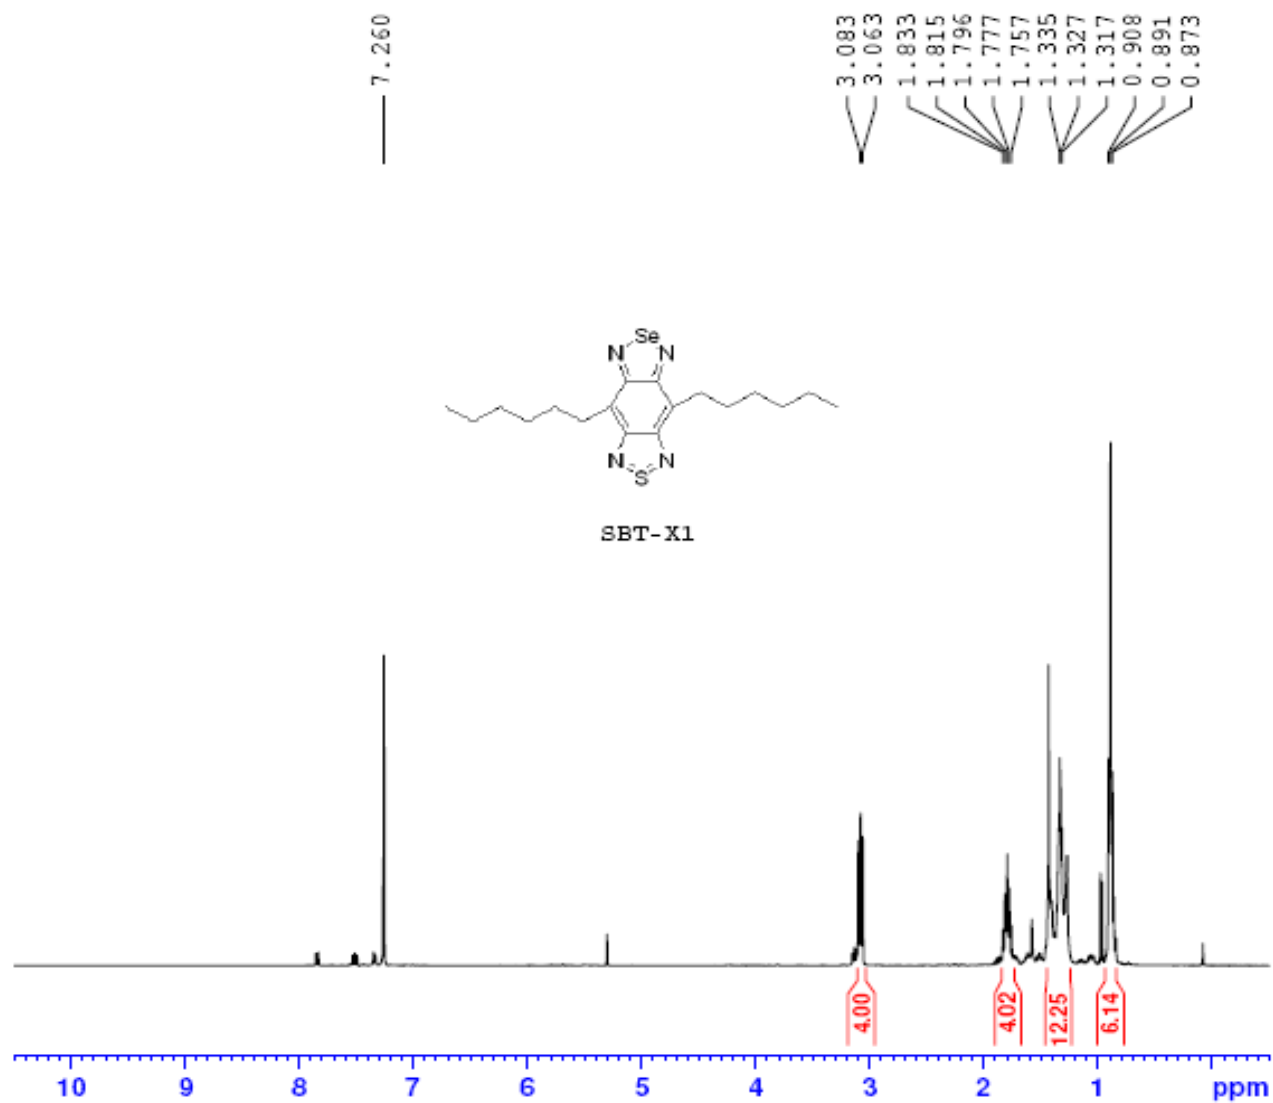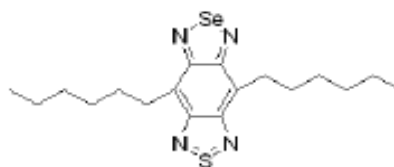

SBT-X1

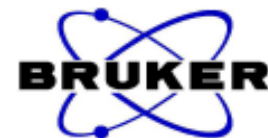

Current Data Parameters  
NAME 110417  
EXPNO 2  
PROCNO 1

F2 - Acquisition Parameters  
Date\_ 20110417  
Time 13.15  
INSTRUM AV400  
PROBHD 5 mm PABBO BB-  
PULPROG zg30  
TD 65536  
SOLVENT CDCl3  
NS 11  
DS 0  
SWH 8278.146 Hz  
FIDRES 0.126314 Hz  
AQ 3.9584243 sec  
RG 256  
DW 60.400 usec  
DE 6.00 usec  
TE 300.4 K  
D1 2.00000000 sec  
TD0 1

----- CHANNEL f1 -----  
NUC1 1H  
P1 12.50 usec  
PL1 -2.00 dB  
SFO1 400.1324710 MHz

F2 - Processing parameters  
SI 32768  
SF 400.1300062 MHz  
WDW EM  
SSB 0  
LB 0.30 Hz  
GB 0  
PC 0.01

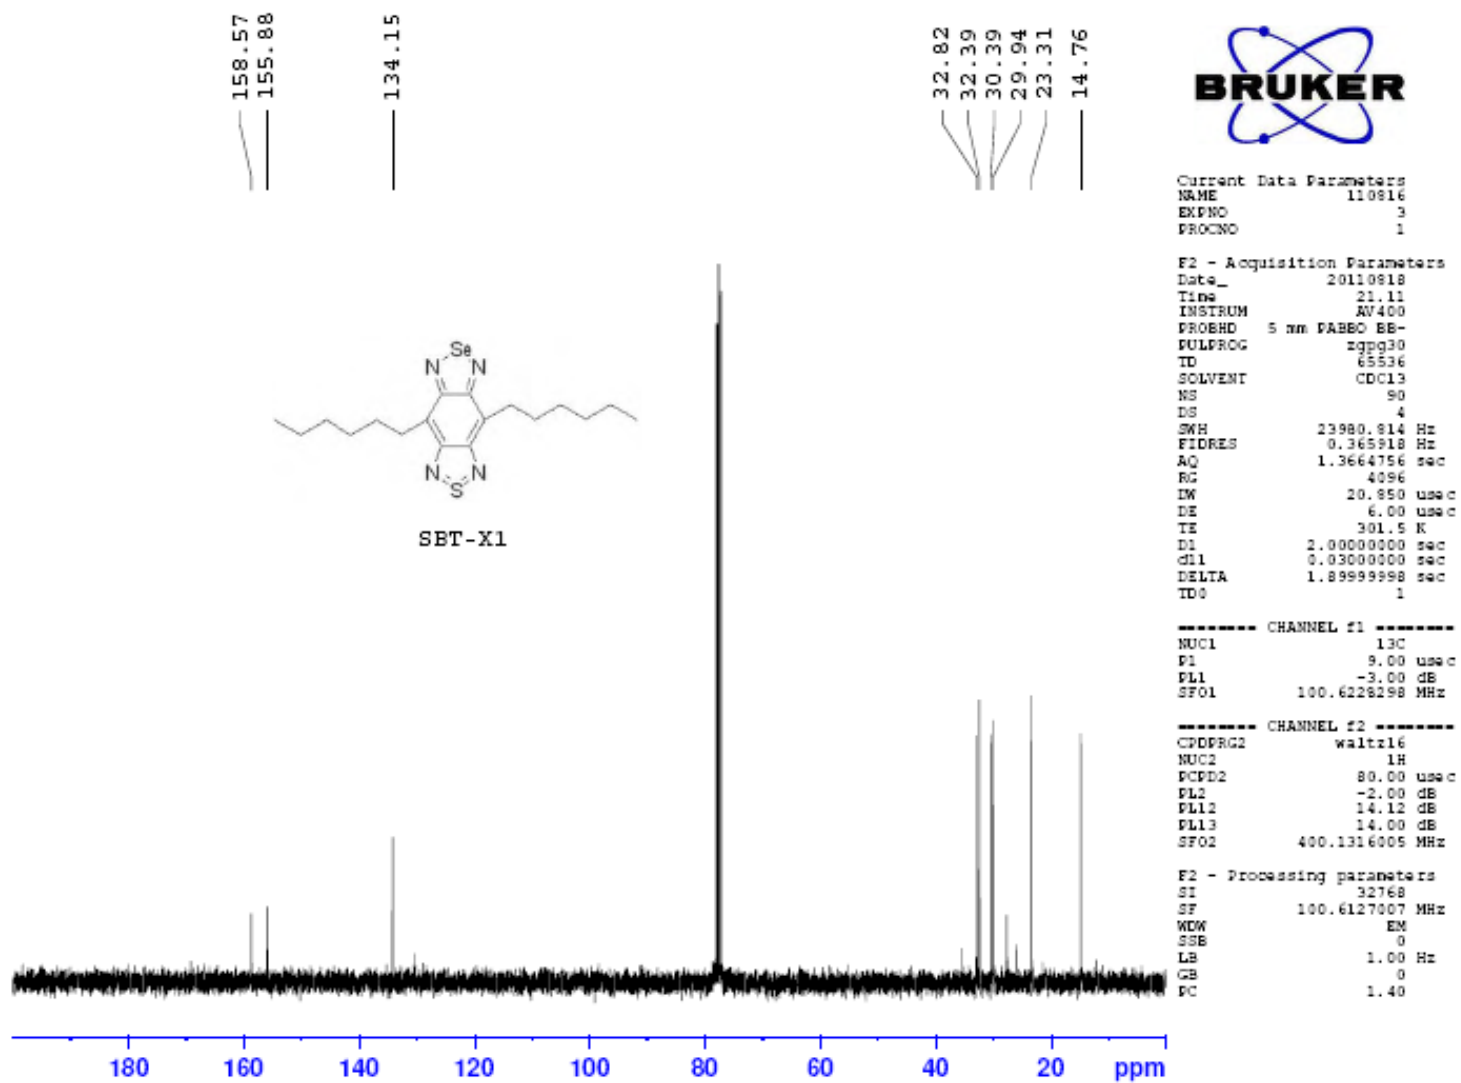

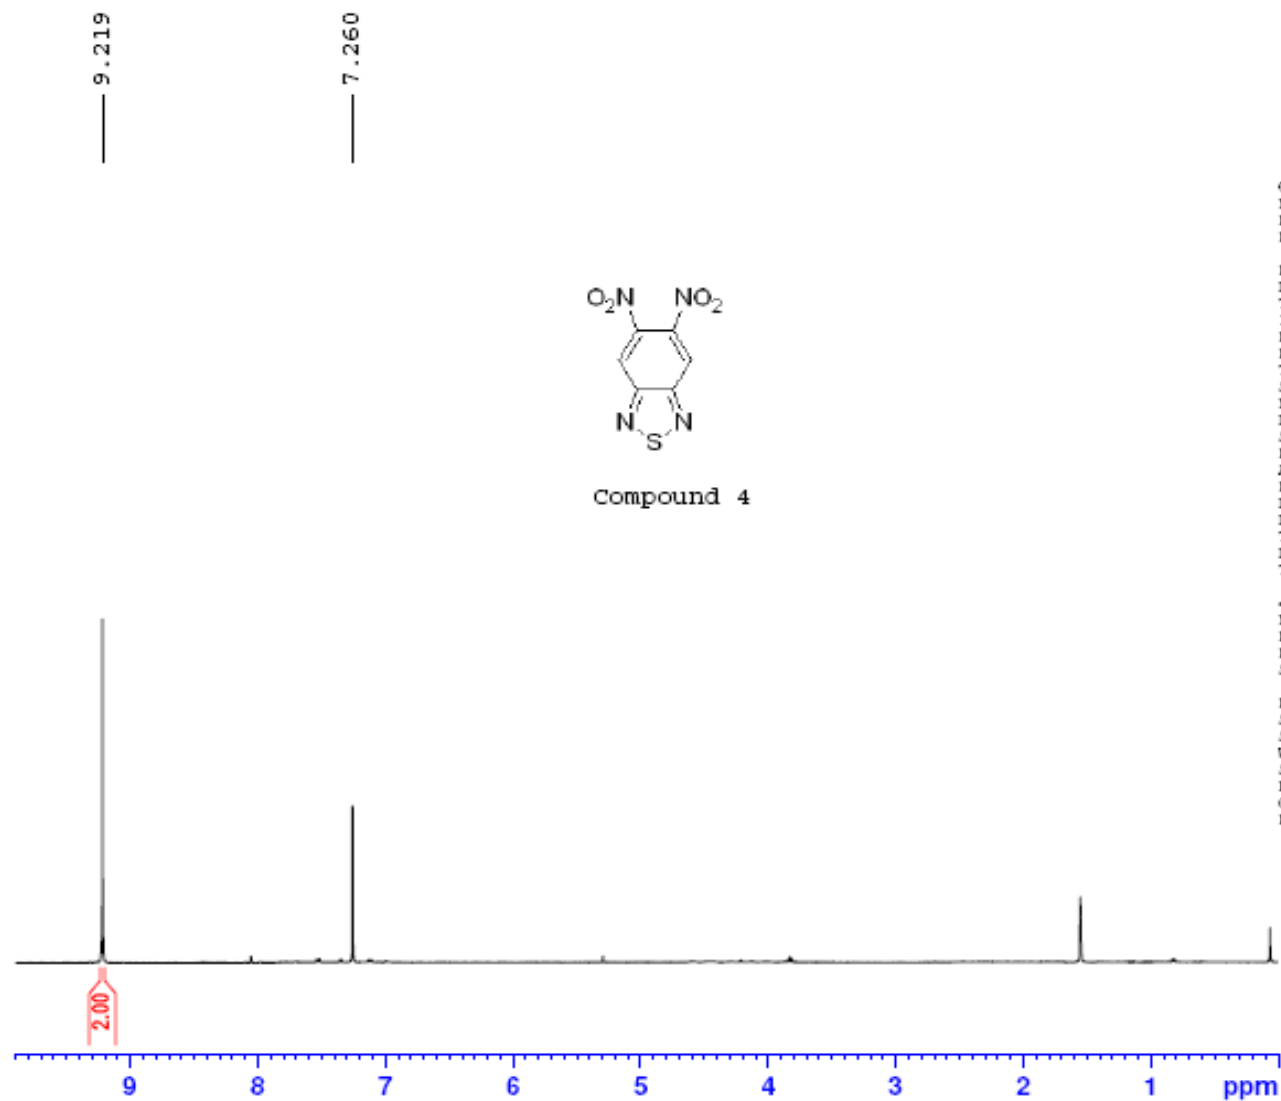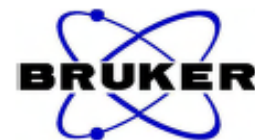

Current Data Parameters  
NAME 110615  
EXPNO 3  
PROCNO 1

F2 - Acquisition Parameters  
Date\_ 20110615  
Time 22.00  
INSTRUM AV400  
PROBHD 5 mm PABBO BB-  
PULPROG zg30  
TD 65536  
SOLVENT CDCl3  
NS 18  
DS 0  
SWH 8278.146 Hz  
FIDRES 0.126314 Hz  
AQ 3.9584243 sec  
RG 287.4  
DW 60.400 usec  
DE 6.00 usec  
TE 295.6 K  
D1 2.00000000 sec  
TDO 1

----- CHANNEL f1 -----  
NUC1 1H  
P1 12.50 usec  
PL1 -2.00 dB  
SF01 400.1324710 MHz

F2 - Processing parameters  
SI 32768  
SF 400.1300090 MHz  
WIM EM  
SSB 0  
LB 0.30 Hz  
GB 0  
FC 0.50

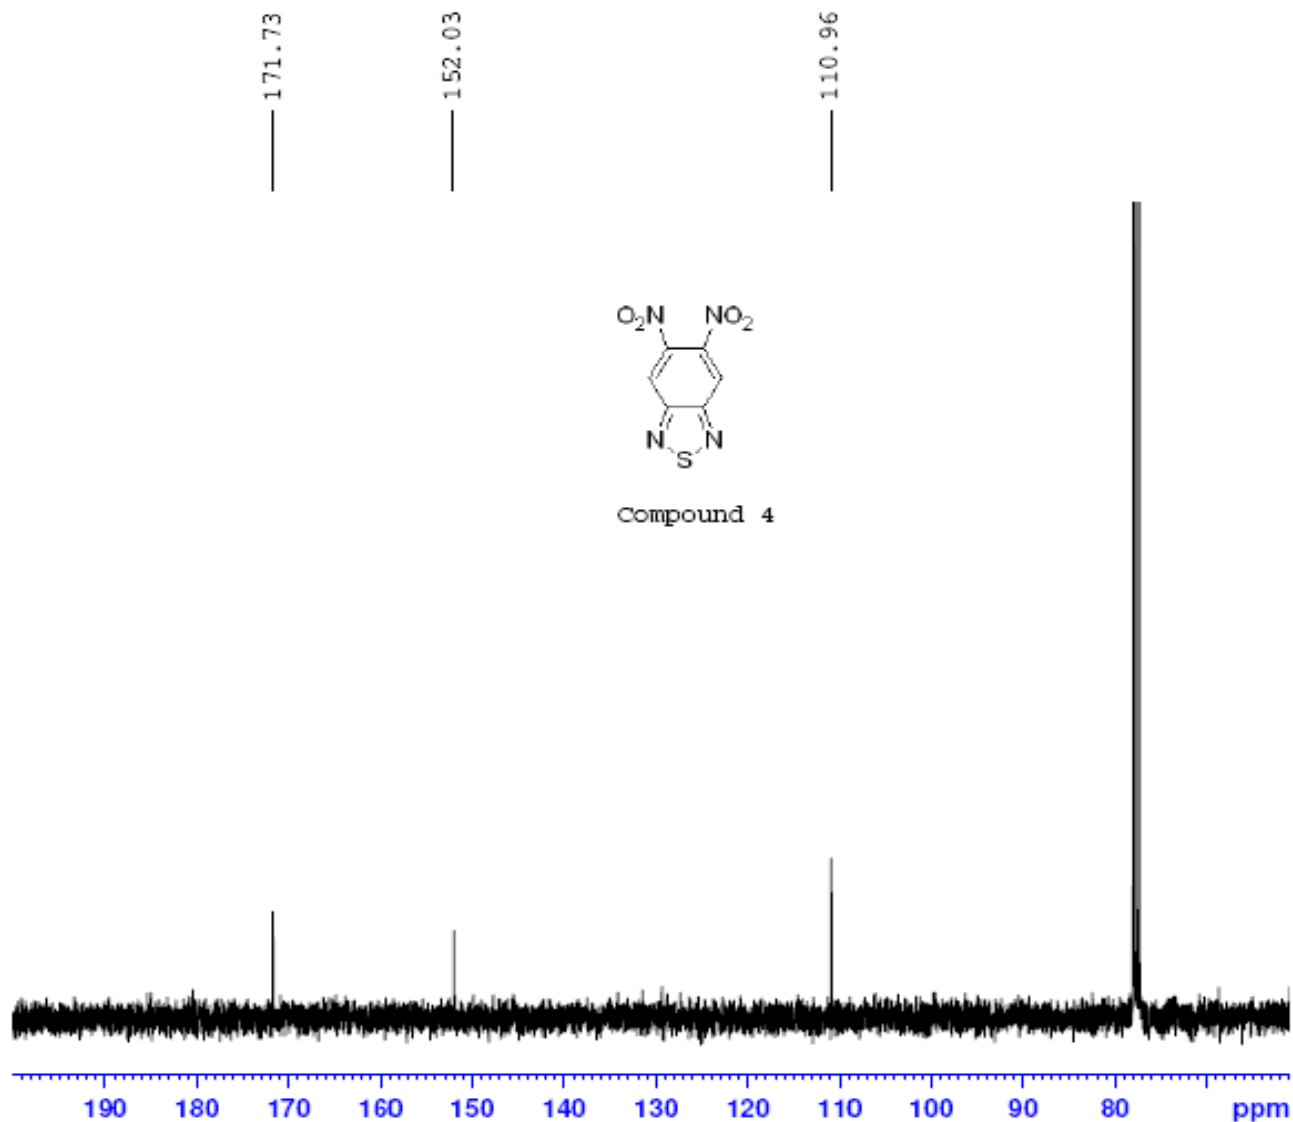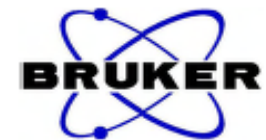

Current Data Parameters  
NAME 110615  
EXPNO 3  
PROCNO 1

F2 - Acquisition Parameters  
Date\_ 20110615  
Time 17.37  
INSTRUM AV400  
PROBHD 5 mm PABBO BB-  
PULPROG zgpg30  
TD 65536  
SOLVENT CDCl3  
NS 149  
DS 4  
SWH 23980.814 Hz  
FIDRES 0.365918 Hz  
AQ 1.3664756 sec  
RG 32768  
DW 20.850 usec  
DE 6.00 usec  
TE 296.3 K  
D1 2.0000000 sec  
d11 0.0300000 sec  
DELTA 1.89999998 sec  
TD0 1

----- CHANNEL f1 -----  
NUC1 13C  
P1 9.00 usec  
PL1 -3.00 dB  
SFO1 100.6228298 MHz

----- CHANNEL f2 -----  
CPDPRG2 waltz16  
NUC2 1H  
PCPD2 80.00 usec  
PL2 -2.00 dB  
PL12 14.12 dB  
PL13 14.00 dB  
SFO2 400.1316005 MHz

F2 - Processing parameters  
SI 32768  
SF 100.6127029 MHz  
WDW EM  
SSB 0  
LB 1.00 Hz  
GB 0  
PC 1.40



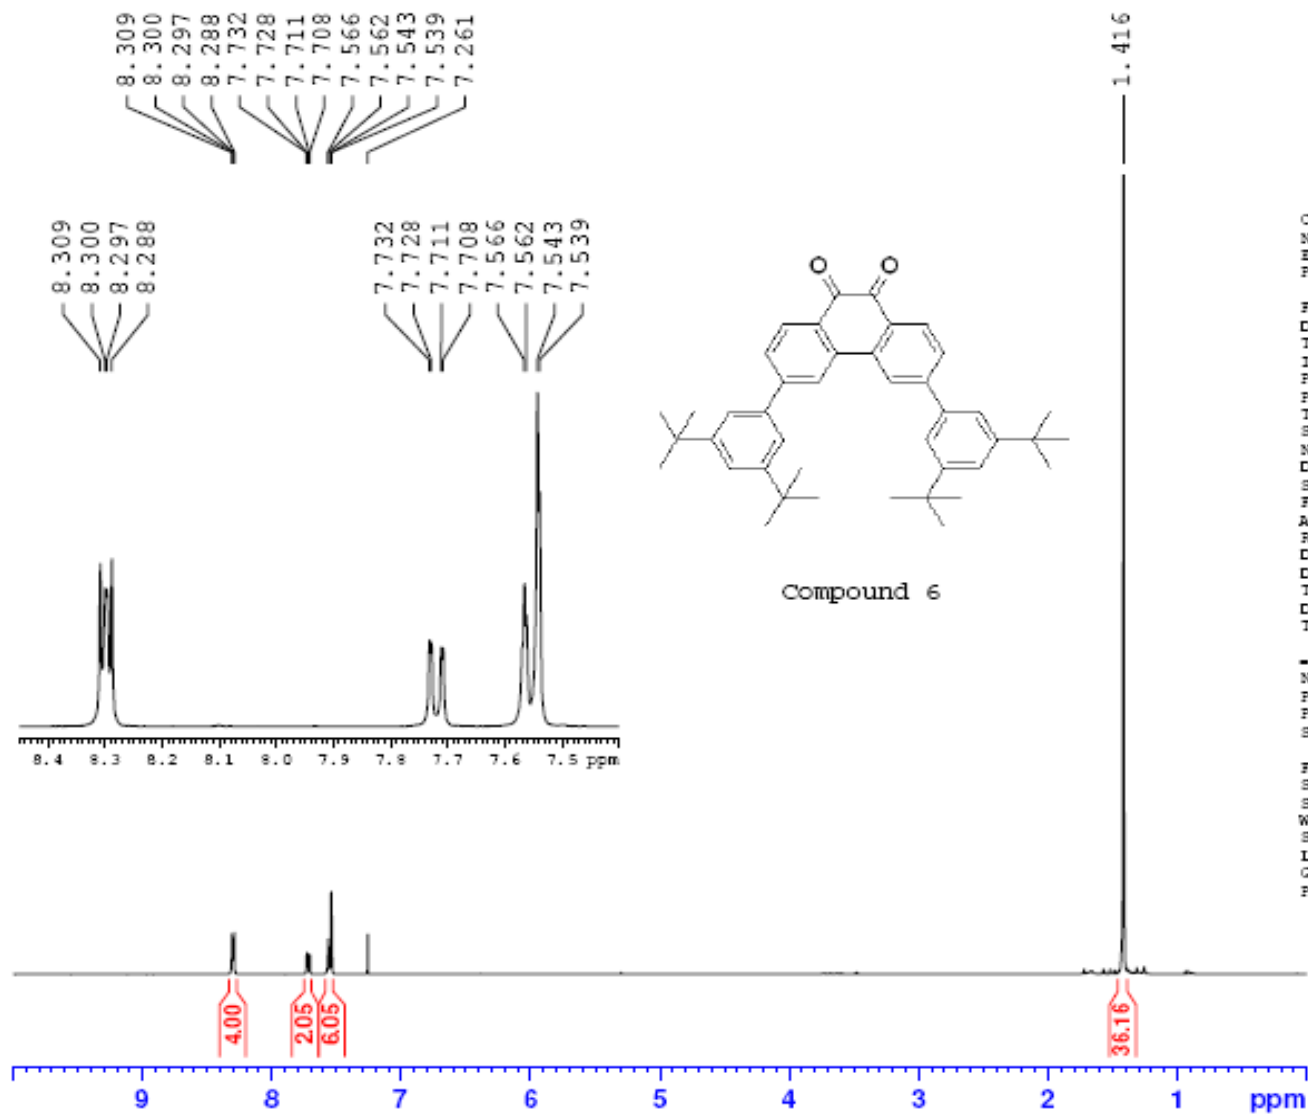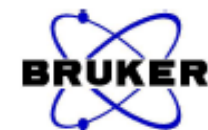

Current Data Parameters  
NAME 110307  
EXPNO 1  
PROCNO 1

F2 - Acquisition Parameters  
Date\_ 20110307  
Time 12.54  
INSTRUM AV400  
PROBHD 5 mm PABBO BB-  
PULPROG zg30  
TD 65536  
SOLVENT CDCl3  
NS 14  
DS 0  
SWH 8278.146 Hz  
FIDRES 0.126314 Hz  
AQ 3.9584243 sec  
RG 256  
CW 60.400 us  
DE 6.00 us  
TE 298.2 K  
D1 2.00000000 sec  
TD0 1

----- CHANNEL f1 -----  
NUC1 1H  
P1 12.50 us  
PL1 -2.00 dB  
SFO1 400.1324710 MHz

F2 - Processing parameters:  
SI 32768  
SF 400.1300090 MHz  
WDW EM  
SSB 0  
LB 0.30 Hz  
GB 0  
PC 0.02

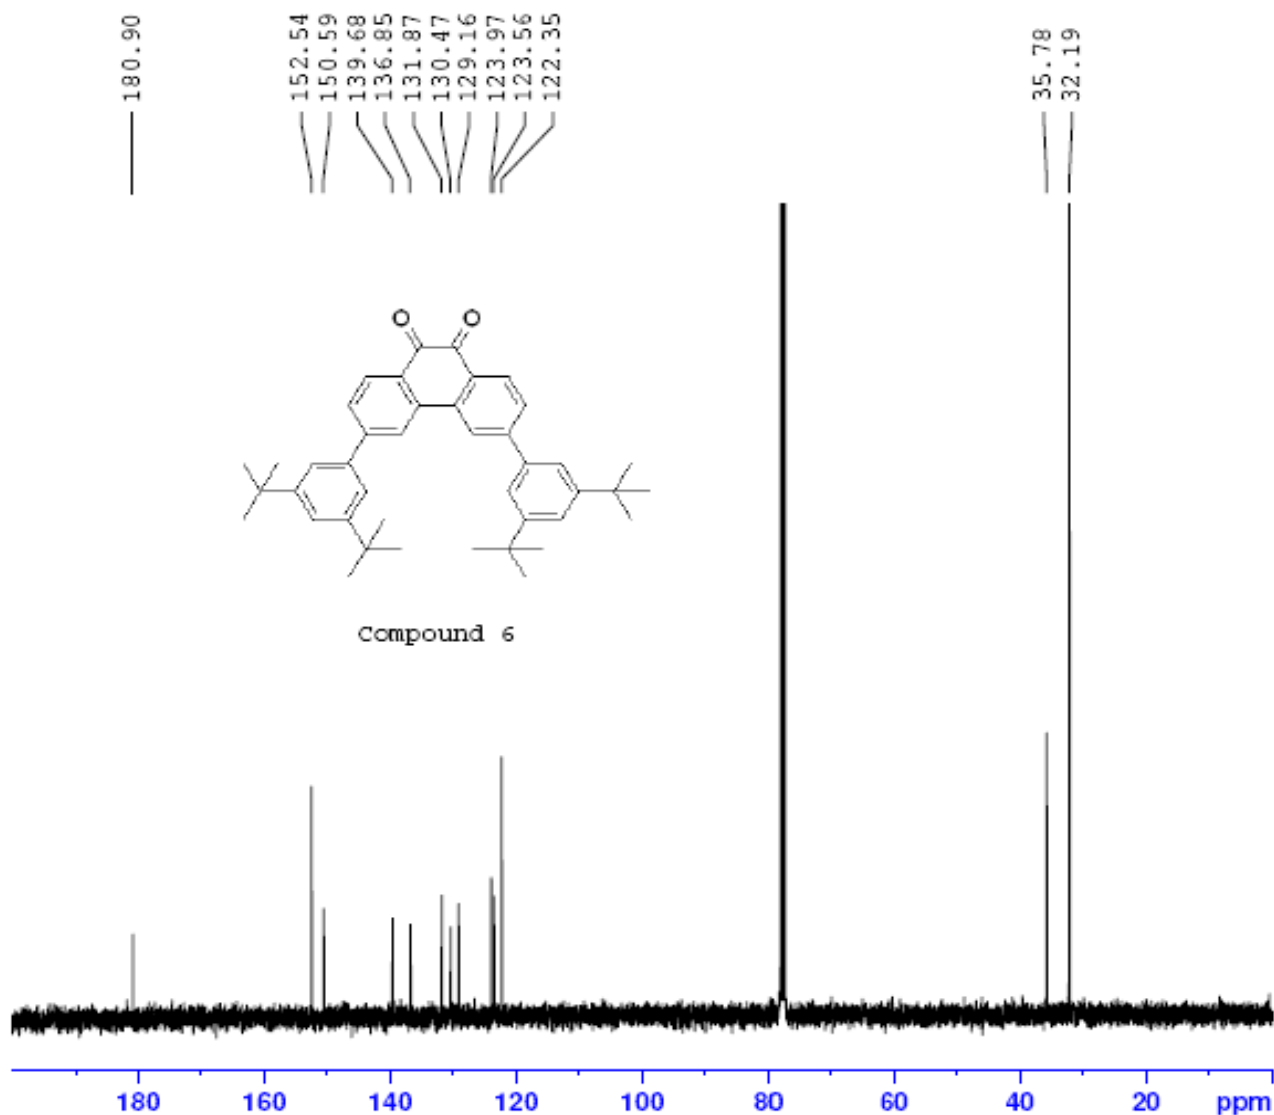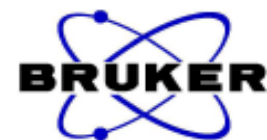

Current Data Parameters  
NAME 110307  
EXPNO 2  
PROCNO 1

F2 - Acquisition Parameters  
Date\_ 20110307  
Time 13.05  
INSTRUM AV400  
PROBHD 5 mm PABBO BB-  
PULPROG zgpg30  
TD 65536  
SOLVENT CDCl3  
NS 346  
DS 4  
SWH 23990.814 Hz  
FIDRES 0.365918 Hz  
AQ 1.3664756 sec  
RG 3649.1  
DW 20.850 usec  
DE 6.00 usec  
TE 299.1 K  
D1 2.00000000 sec  
d11 0.03000000 sec  
DELTA 1.89999998 sec  
TD0 1

----- CHANNEL f1 -----  
NUC1 13C  
P1 9.00 usec  
PL1 -3.00 dB  
SFO1 100.6228298 MHz

----- CHANNEL f2 -----  
CPDPRG2 waltz16  
NUC2 1H  
PCPD2 90.00 usec  
PL2 -2.00 dB  
PL12 14.12 dB  
PL13 14.00 dB  
SFO2 400.1316005 MHz

F2 - Processing parameters  
SI 32768  
SF 100.6127006 MHz  
WDW EM  
SSB 0  
LB 1.00 Hz  
GB 0  
PC 0.50

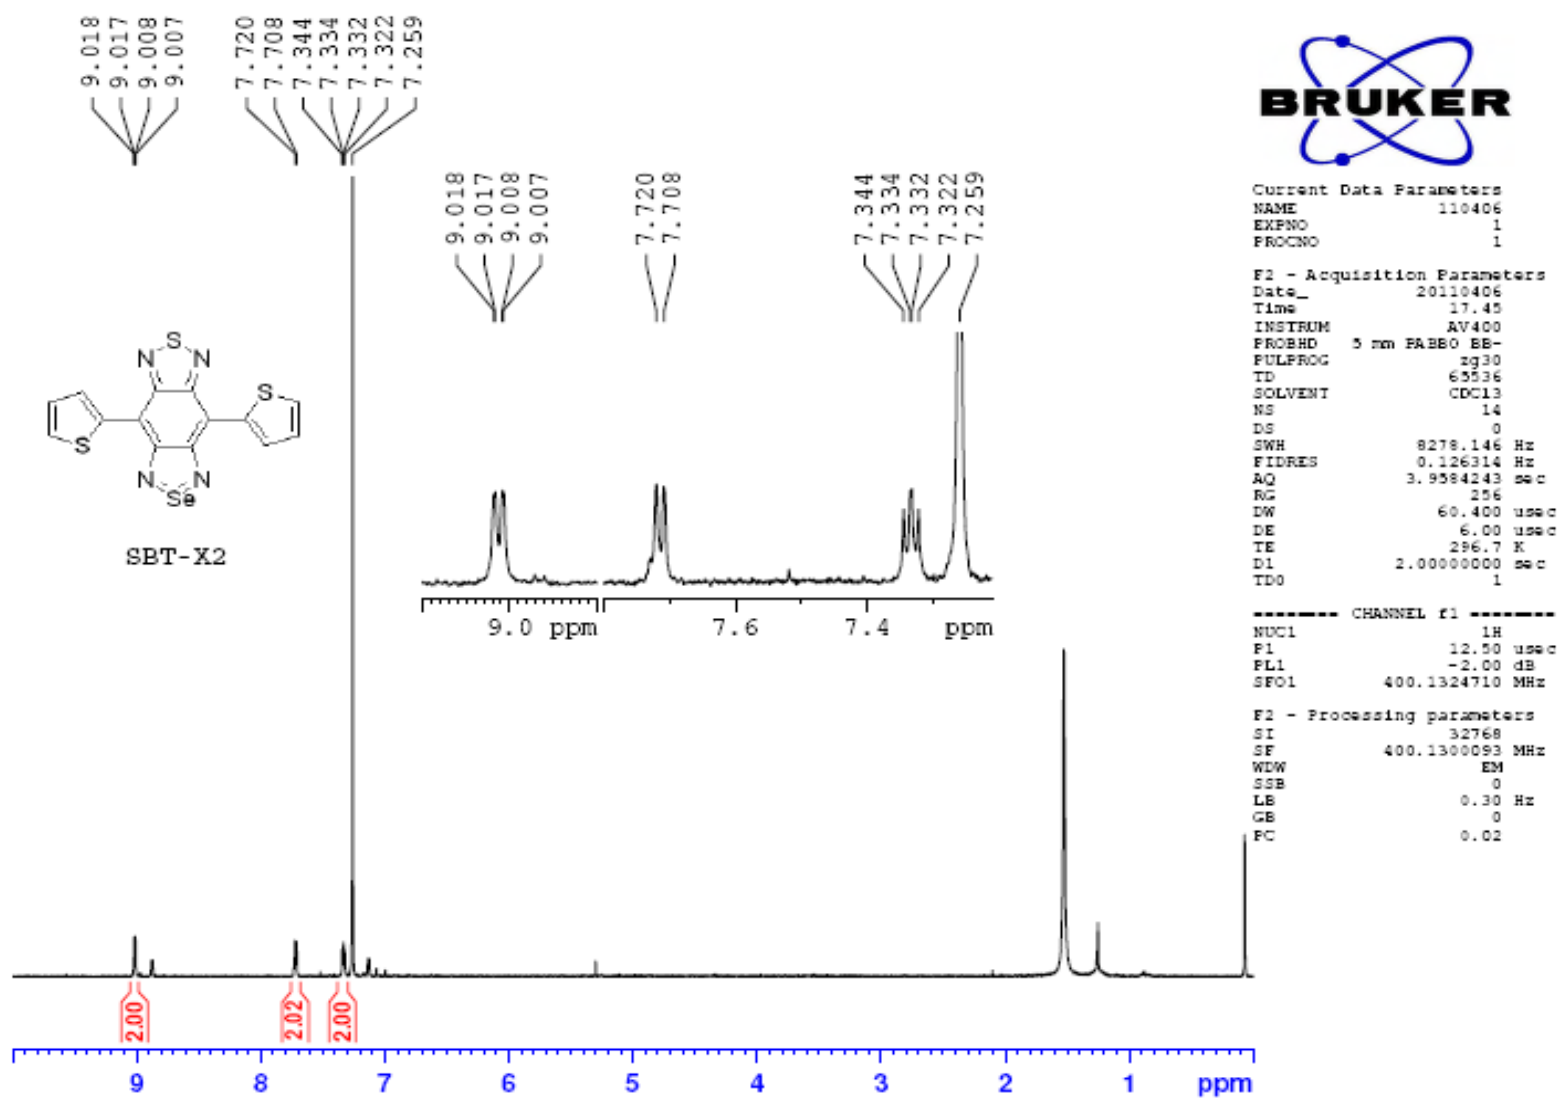

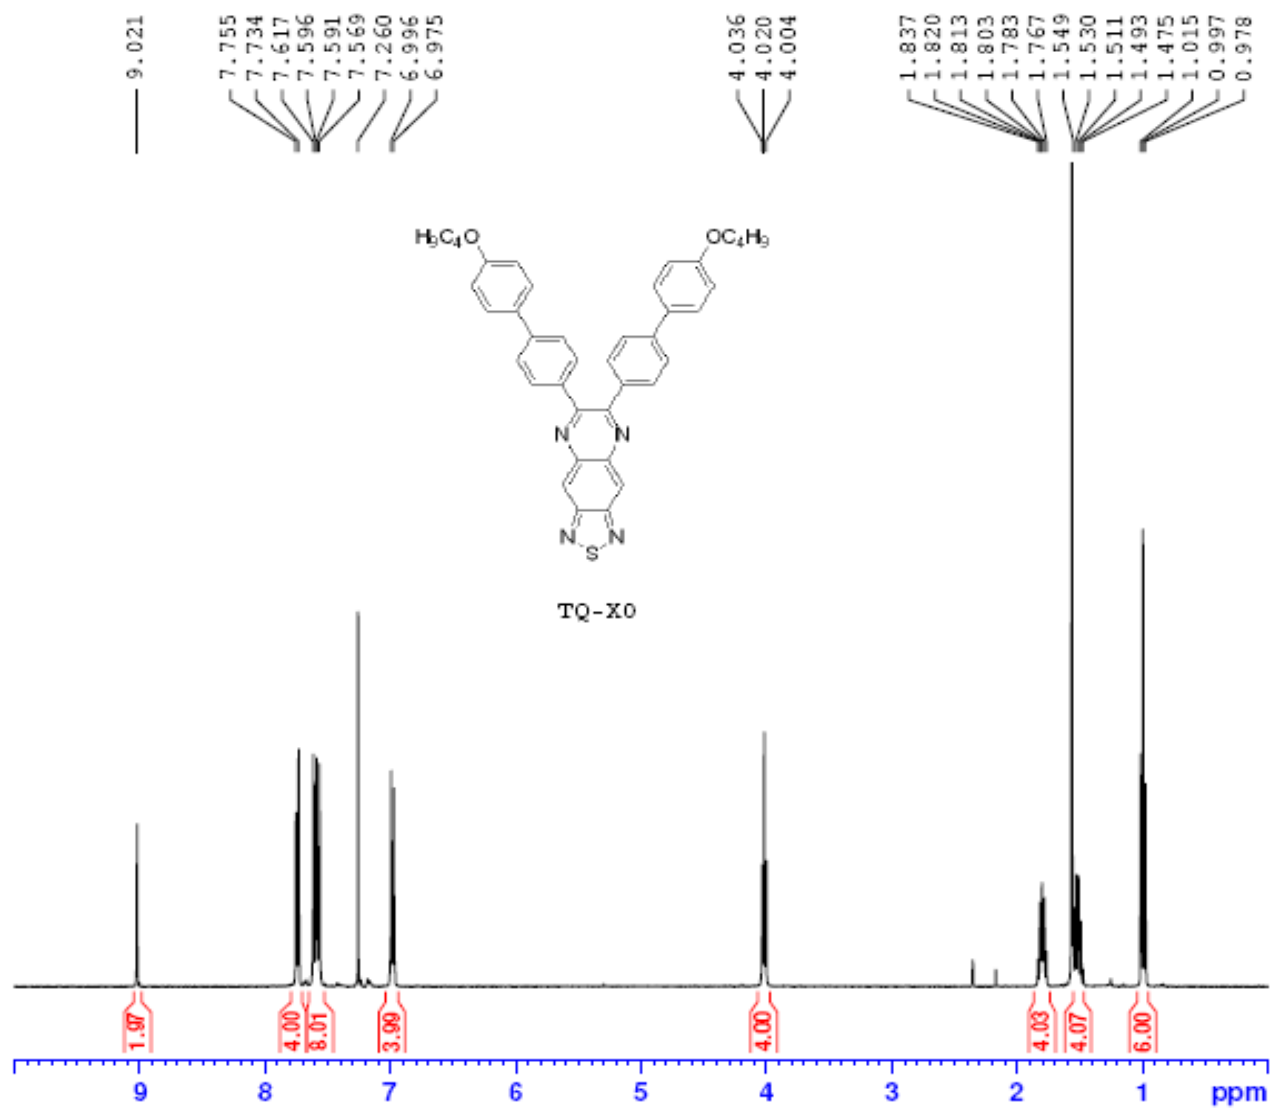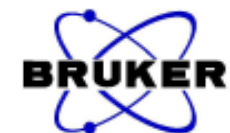

Current Data Parameters  
NAME 20100616  
EXPNO 1  
PROCNO 1

F2 - Acquisition Parameters  
Date\_ 20100616  
Time 14.01  
INSTRUM AV400  
PROBHD 5 mm F400 BB-  
PULPROG zg30  
TD 65536  
SOLVENT CDCl3  
NS 14  
DS 2  
SWH 9278.146 Hz  
FIDRES 0.126314 Hz  
AQ 3.9584243 sec  
RG 645.1  
DW 60.400 usec  
DE 6.00 usec  
TE 297.3 K  
D1 1.00000000 sec  
TD0 1

----- CHANNEL f1 -----  
NUC1 1H  
P1 12.50 usec  
PL1 -2.00 dB  
SFO1 400.1324710 MHz

F2 - Processing parameters  
SI 32768  
SF 400.1300095 MHz  
WDW EM  
SSB 0  
LB 0.30 Hz  
GB 0  
PC 1.00

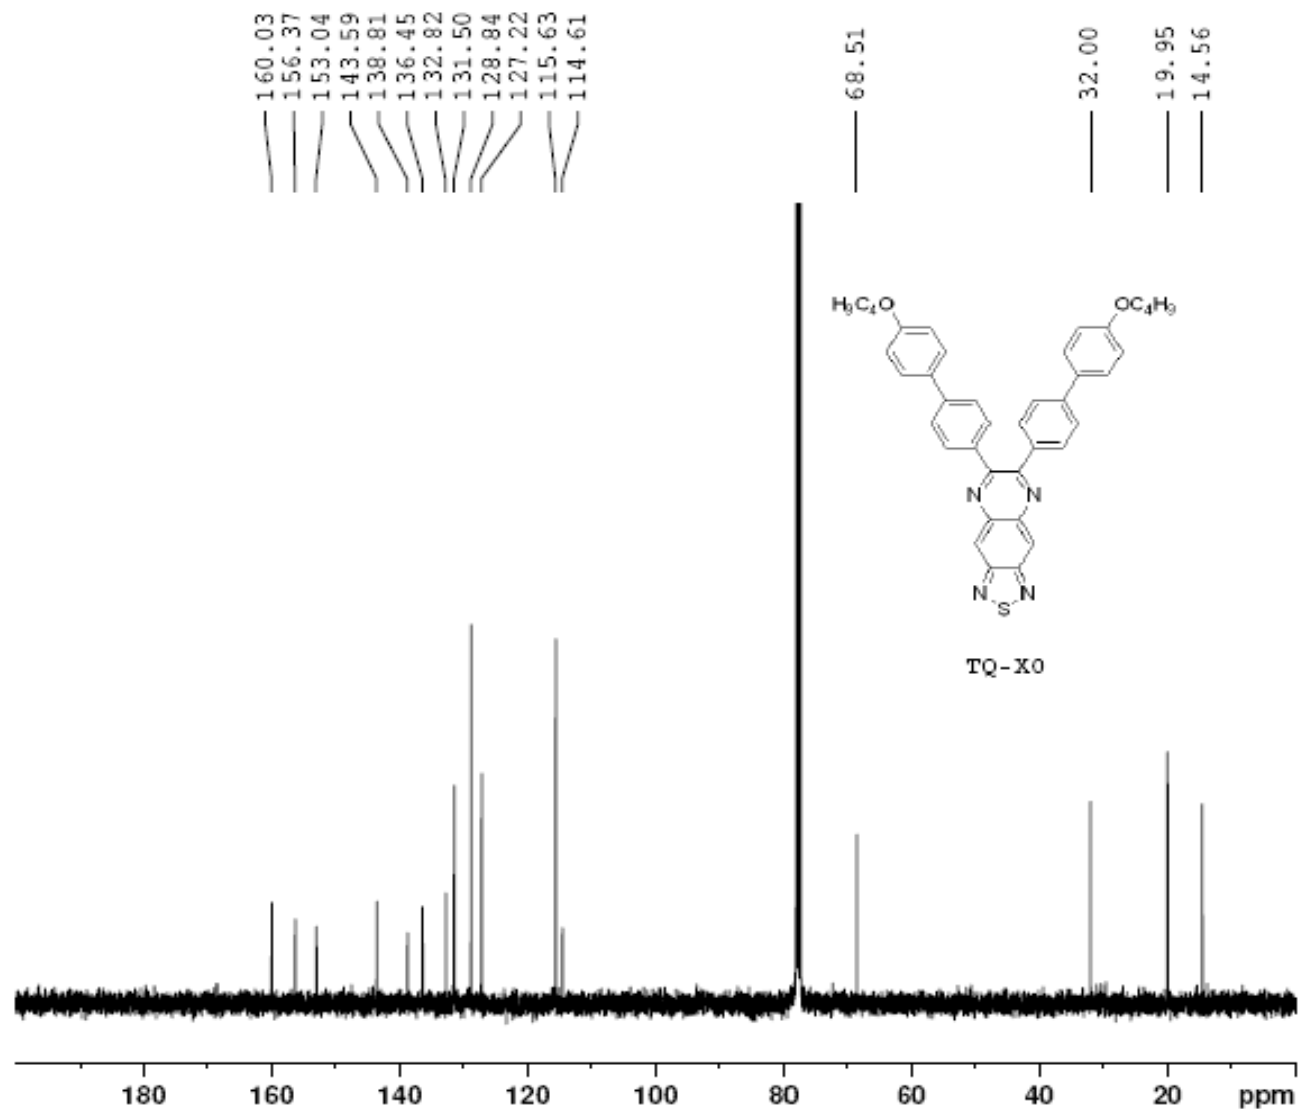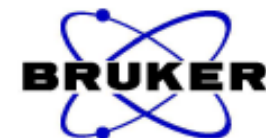

Current Data Parameters  
NAME 100507  
EXPNO 3  
PROCNO 1

F2 - Acquisition Parameters  
Date\_ 20100507  
Time 17.48  
INSTRUM AV400  
PROBHD 5 mm PABBO BB-  
PULPROG zgpg30  
TD 65536  
SOLVENT CDCl<sub>3</sub>  
NS 968  
DS 4  
SWH 23980.814 Hz  
FIDRES 0.365918 Hz  
AQ 1.3664756 sec  
RG 4096  
DW 20.850 usec  
DE 6.00 usec  
TE 298.0 K  
D1 2.00000000 sec  
d11 0.03000000 sec  
DELTA 1.89999998 sec  
TD0 1

----- CHANNEL f1 -----  
NUC1 13C  
P1 9.00 usec  
PL1 -3.00 dB  
SFO1 100.6228298 MHz

----- CHANNEL f2 -----  
CPDPRG2 waltz16  
NUC2 1H  
PCPD2 80.00 usec  
PL2 -2.00 dB  
PL12 14.12 dB  
PL13 14.00 dB  
SFO2 400.1316005 MHz

F2 - Processing parameters  
SI 32768  
SF 100.6127007 MHz  
WDW EM  
SSB 0  
LB 1.00 Hz  
GB 0  
PC 1.40

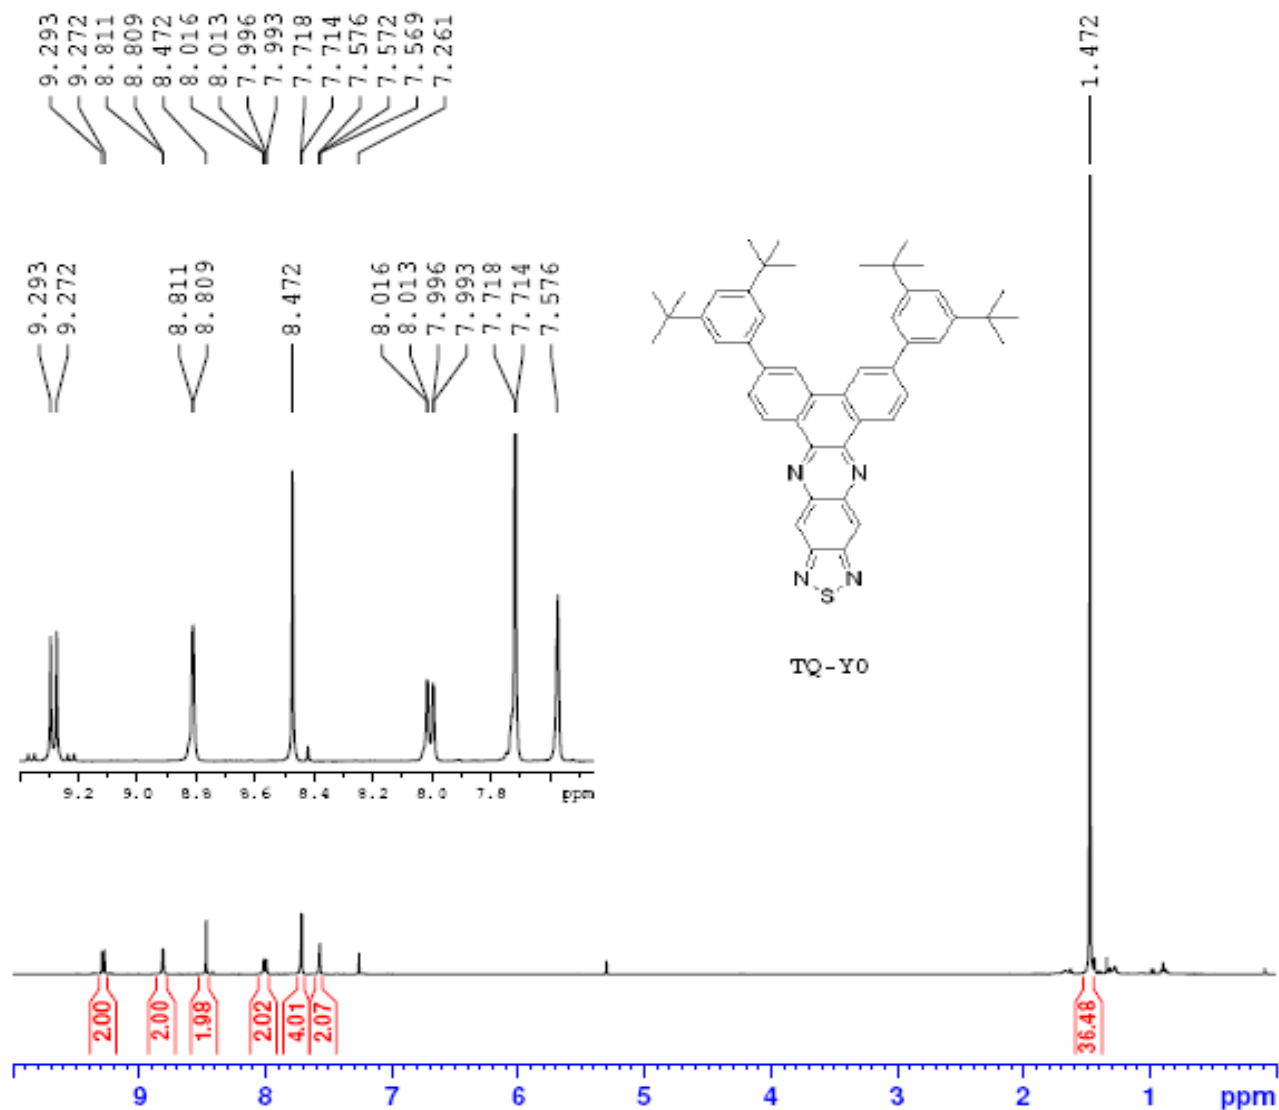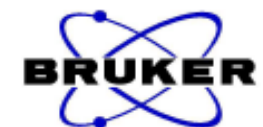

Current Data Parameters  
NAME 110704  
EXPNO 1  
PROCNO 1

F2 - Acquisition Parameter  
Date\_ 20110704  
Time 18.06  
INSTRUM AV400  
PROBHD 5 mm PABBO BB-  
PULPROG zg30  
TD 65536  
SOLVENT CDCl3  
NS 19  
DS 0  
SWH 9279.146 Hz  
FIDRES 0.126314 Hz  
AQ 3.9584243 s  
RG 256  
DW 60.400 us  
DE 6.00 us  
TE 300.8 K  
D1 2.00000000 s  
TD0 1

----- CHANNEL f1 -----  
NUC1 1H  
P1 12.50 us  
PL1 -2.00 dB  
SFO1 400.1324710 MHz

F2 - Processing parameters  
SI 32768  
SF 400.1300090 MHz  
WDW EM  
SSB 0  
LB 0.30 Hz  
GB 0  
PC 0.02

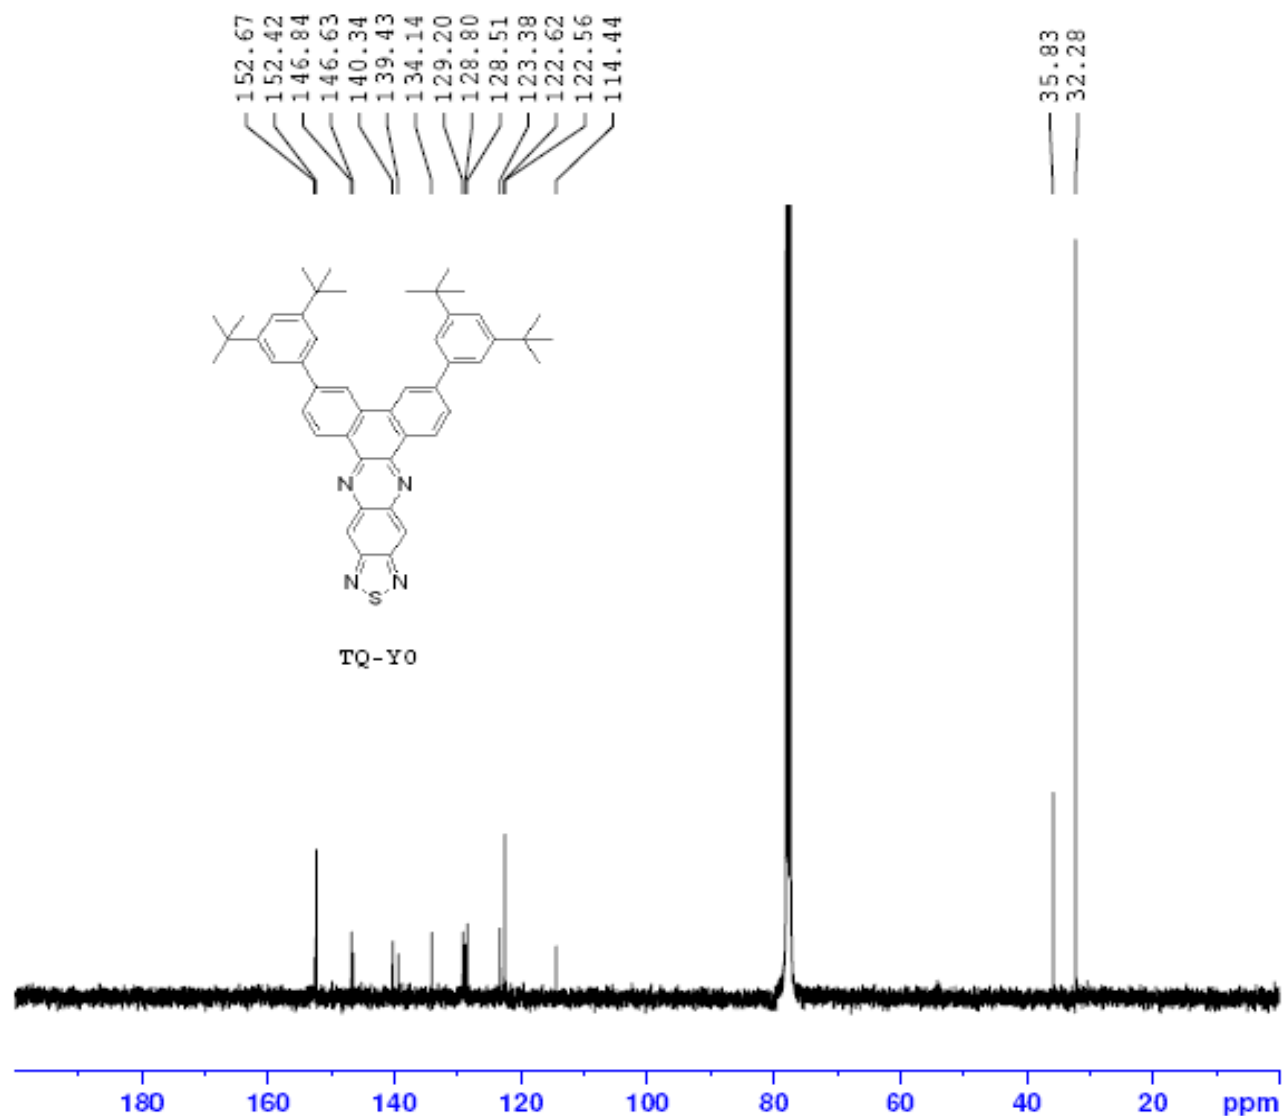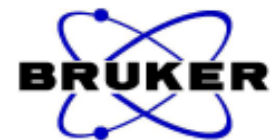

Current Data Parameters  
NAME 110429  
EXFNO 2  
PROCNO 1

F2 - Acquisition Parameters  
Date\_ 20110429  
Time 17.36  
INSTRUM AV400  
PROBHD 5 mm PABBO BB-  
PULPROG zgpg30  
TD 65536  
SOLVENT CDCl3  
NS 17000  
DS 4  
SWH 23980.814 Hz  
FIDRES 0.365918 Hz  
AQ 1.3664756 sec  
RG 2580.3  
DW 20.850 usec  
DE 6.00 usec  
TE 297.8 K  
D1 2.00000000 sec  
d11 0.03000000 sec  
DELTA 1.89999998 sec  
TD0 1

----- CHANNEL f1 -----  
NUC1 13C  
P1 9.00 usec  
PL1 -3.00 dB  
SFO1 100.6228298 MHz

----- CHANNEL f2 -----  
CPDPRG2 waltz16  
NUC2 1H  
PCPD2 80.00 usec  
PL2 -2.00 dB  
PL12 14.12 dB  
PL13 14.00 dB  
SFO2 400.1316005 MHz

F2 - Processing parameters  
SI 32768  
SF 100.6127000 MHz  
WDW EM  
SSB 0  
LB 1.00 Hz  
GB 0  
PC 0.10

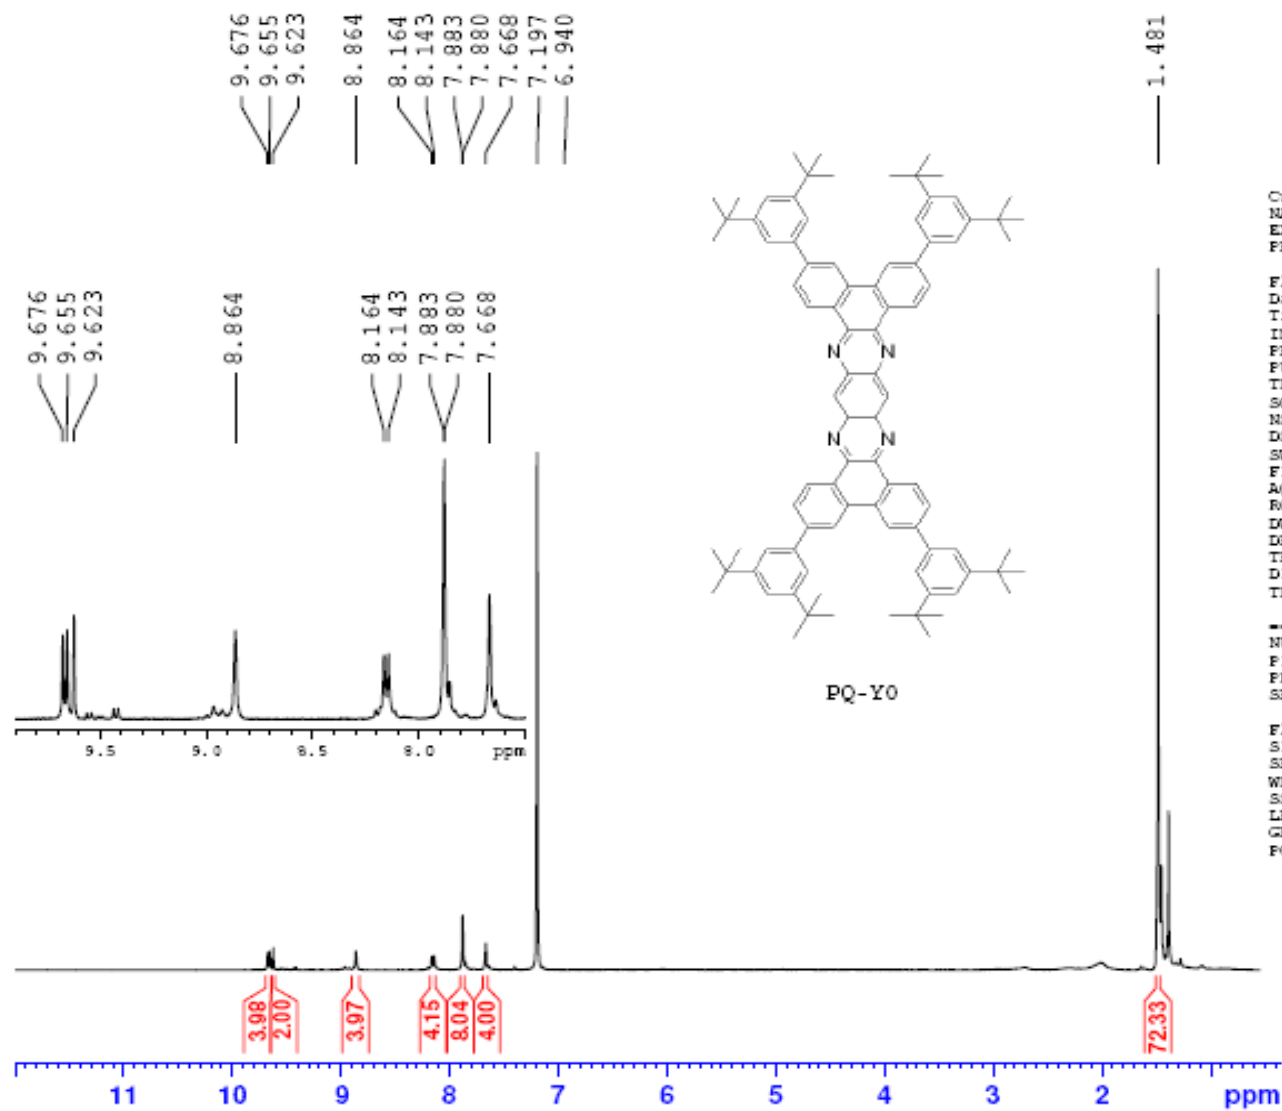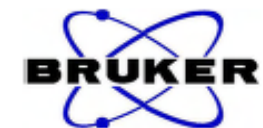

Current Data Parameters  
NAME 20110315  
EXPNO 1  
PROCNO 1

F2 - Acquisition Parameters  
Date\_ 20110315  
Time 12.02  
INSTRUM AV400  
PROBHD 5 mm PABBO BB-  
PULPROG zg30  
TD 65536  
SOLVENT o-DCB  
NS 139  
DS 0  
SWH 9279.146 Hz  
FIDRES 0.126314 Hz  
AQ 3.9584243 sec  
RG 645.1  
DW 60.400 usec  
DE 6.00 usec  
TE 296.6 K  
D1 2.00000000 sec  
TD0 1

----- CHANNEL f1 -----  
NUC1 1H  
P1 12.50 usec  
PL1 -2.00 dB  
SFO1 400.1324710 MHz

F2 - Processing parameters  
SI 32768  
SF 400.1281131 MHz  
WDW EM  
SSB 0  
LB 0.30 Hz  
GB 0  
FC 0.52



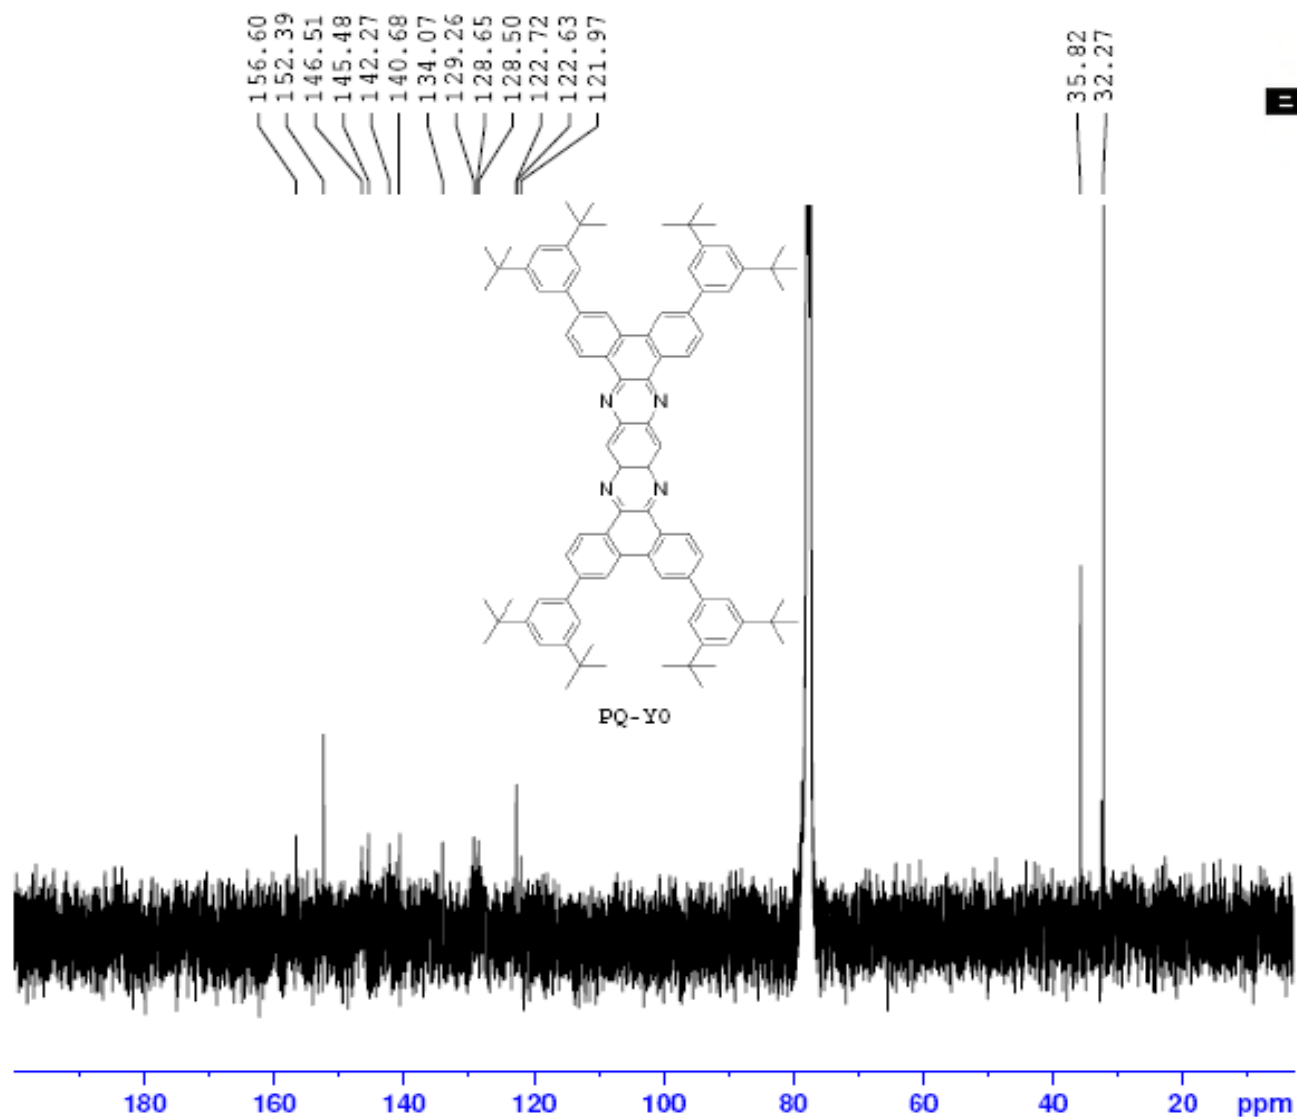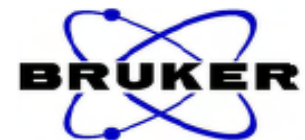

Current Data Parameters  
NAME 110428  
EXPNO 2  
PROCNO 1

F2 - Acquisition Parameters  
Date\_ 20110428  
Time 18.22  
INSTRUM AV400  
PROBHD 5 mm PABBO BB-  
PULPROG zgpg30  
TD 65536  
SOLVENT CDCl3  
NS 15925  
DS 4  
SWH 23980.814 Hz  
FIDRES 0.365918 Hz  
AQ 1.3664756 sec  
RG 2580.3  
IW 20.850 use  
DE 6.00 use  
TE 297.1 K  
D1 2.00000000 sec  
d11 0.03000000 sec  
DELTA 1.89999998 sec  
TD0 1

----- CHANNEL f1 -----  
NUC1 13C  
P1 9.00 use  
PL1 -3.00 dB  
SFO1 100.6228298 MHz

----- CHANNEL f2 -----  
CPDPRG2 waltz16  
NUC2 1H  
PCPD2 80.00 use  
PL2 -2.00 dB  
PL12 14.12 dB  
PL13 14.00 dB  
SFO2 400.1316005 MHz

F2 - Processing parameters  
SI 32768  
SF 100.6127006 MHz  
WDW EM  
SSB 0  
LB 1.00 Hz  
GB 0  
PC 0.10

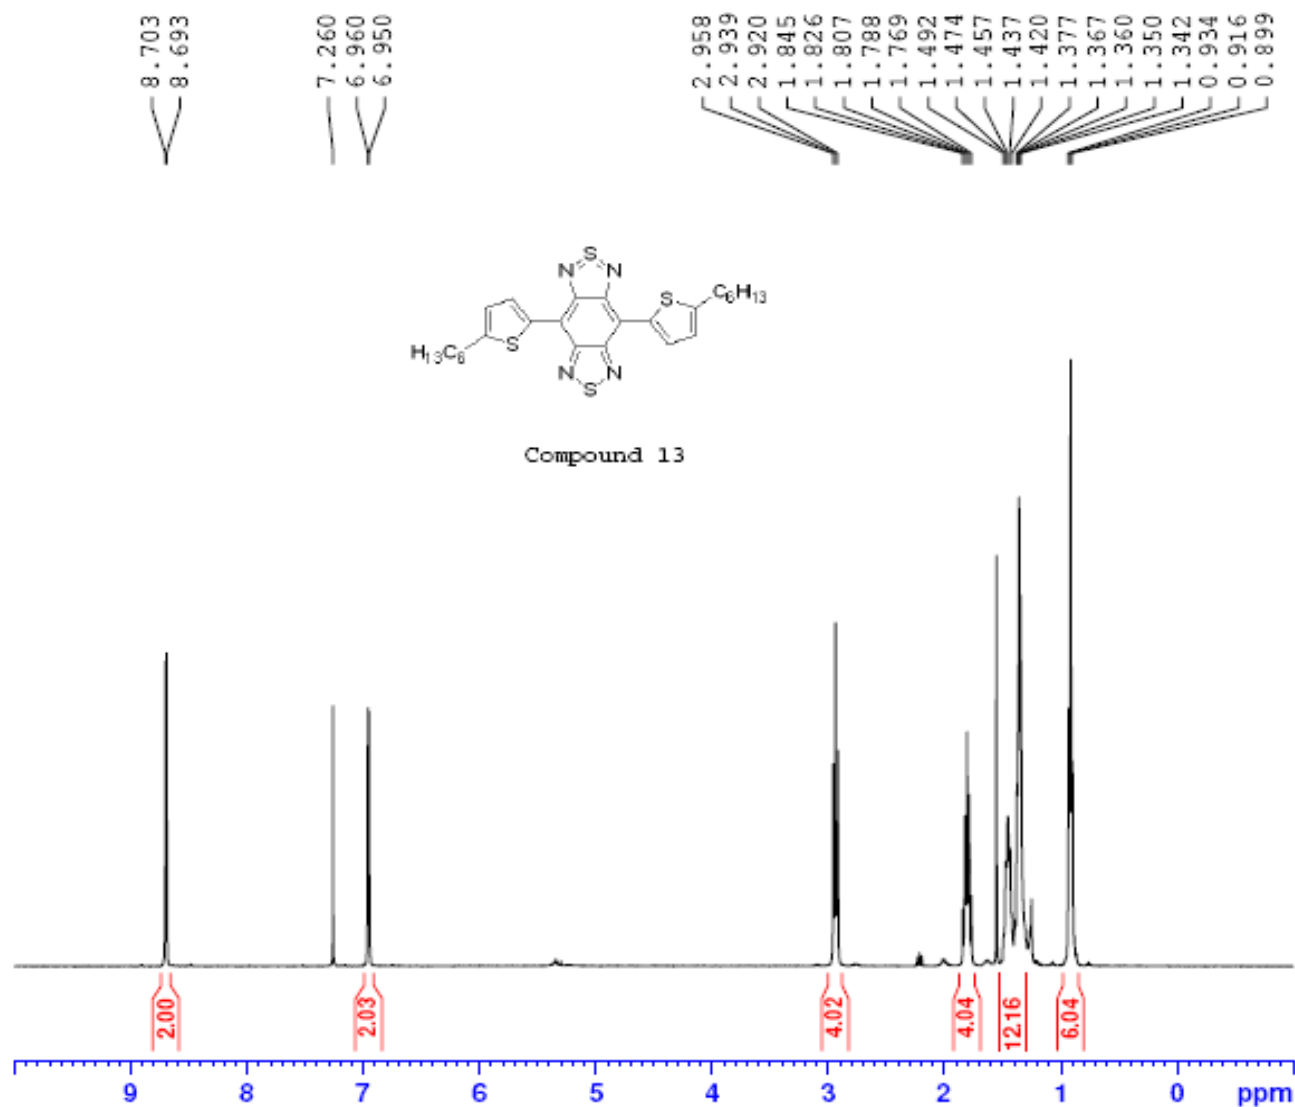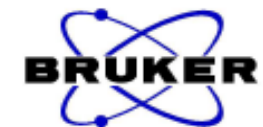

Current Data Parameters  
NAME 101024  
EXPNO 1  
PROCNO 1

F2 - Acquisition Parameters  
Date\_ 20101024  
Time 14.18  
INSTRUM AV400  
PROBHD 5 mm PABBO BB-  
PULPROG zg30  
ID 65536  
SOLVENT CDCl3  
NS 16  
DS 2  
SWH 8278.146 Hz  
FIDRES 0.126314 Hz  
AQ 3.9584243 sec  
RG 322.5  
EW 60.400 use  
DE 6.00 use  
TE 295.5 K  
D1 1.00000000 sec  
TD0 1

----- CHANNEL f1 -----  
NUC1 1H  
P1 12.50 use  
PL1 -2.00 dB  
SFO1 400.1324710 MHz

F2 - Processing parameters  
SI 32768  
SF 400.1300090 MHz  
WDW EM  
SSB 0  
LB 0.30 Hz  
GB 0  
PC 0.10

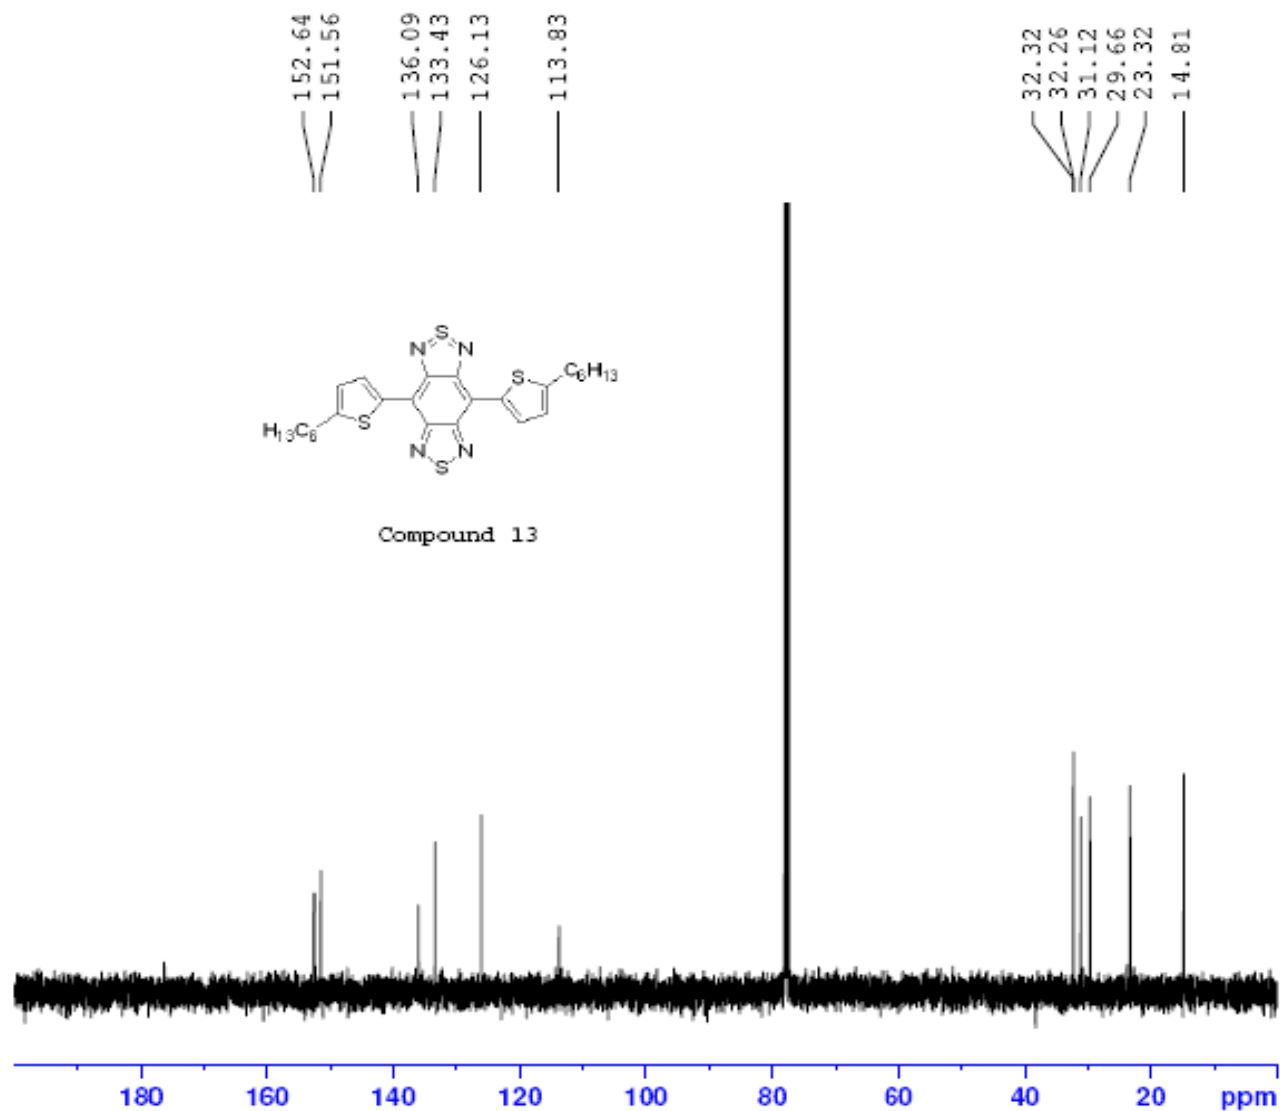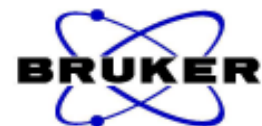

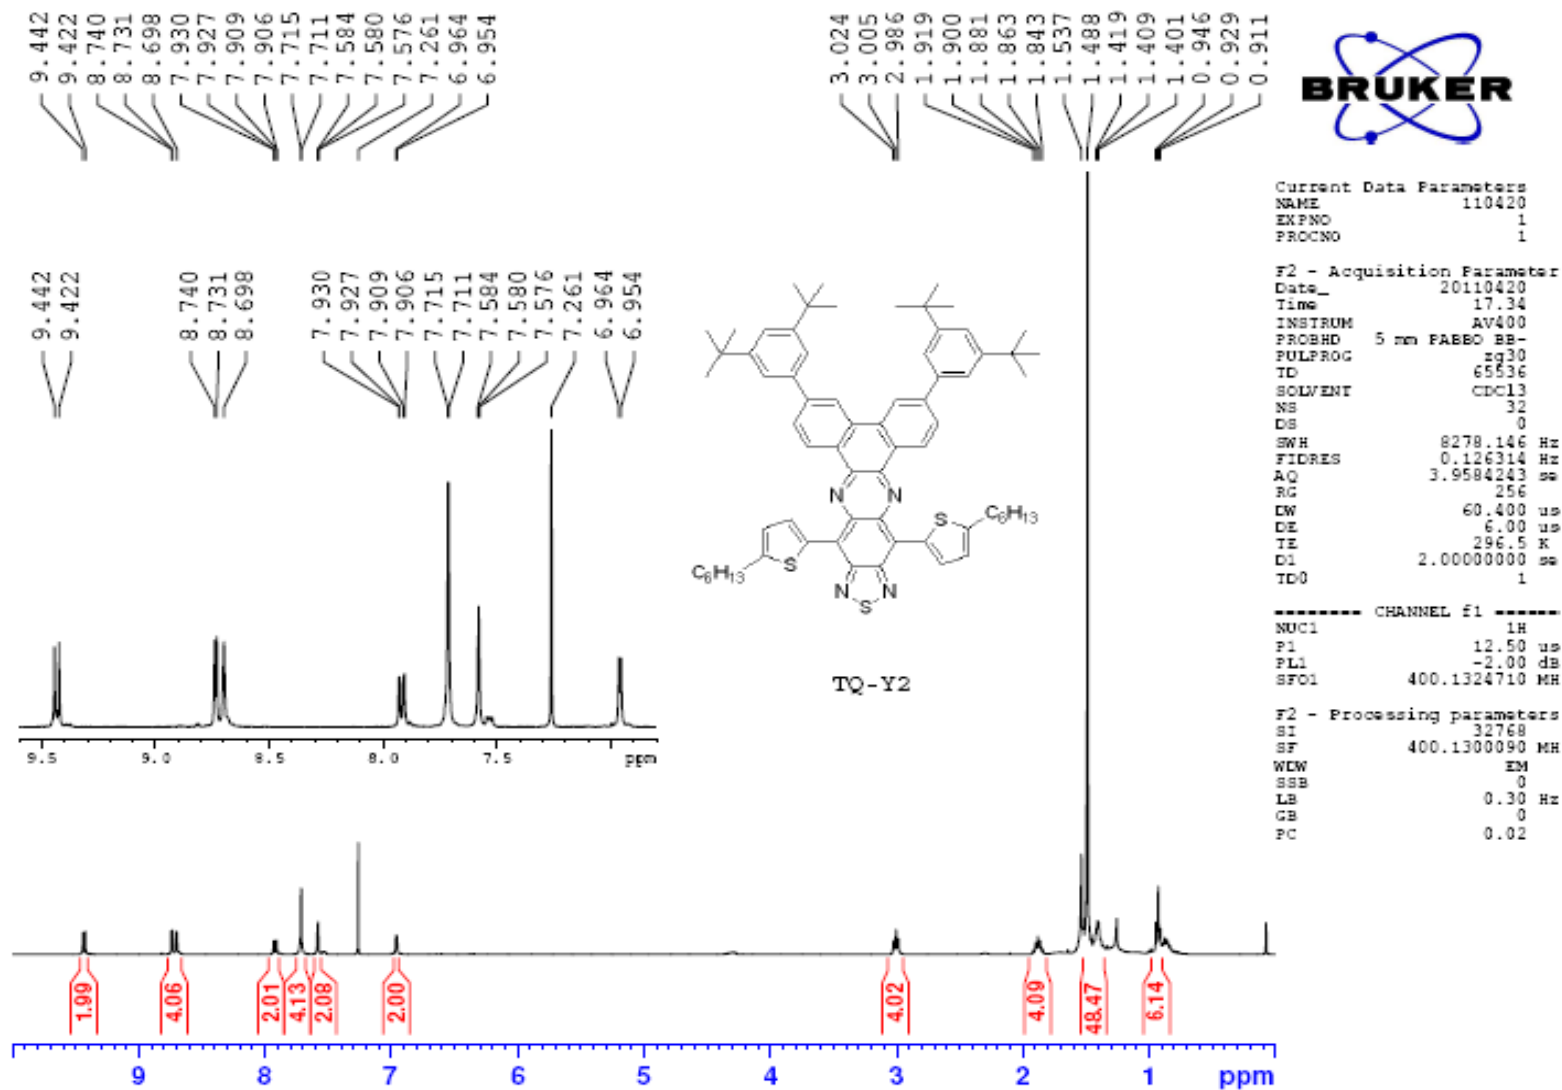

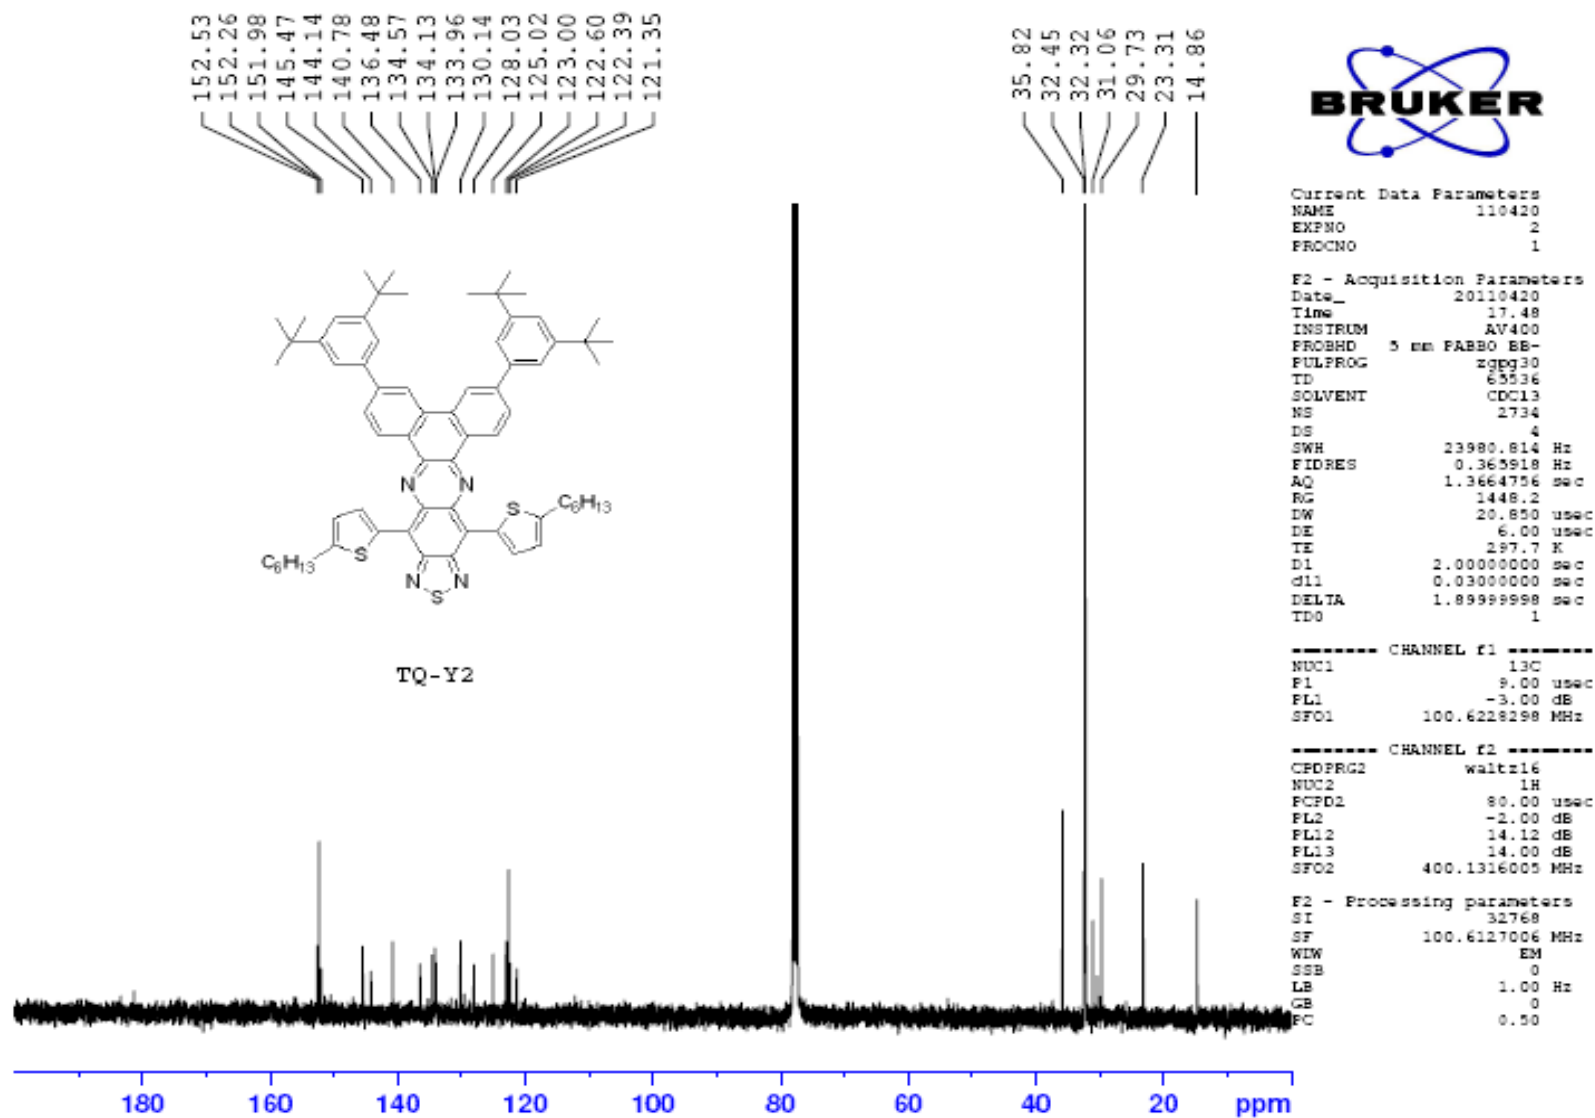

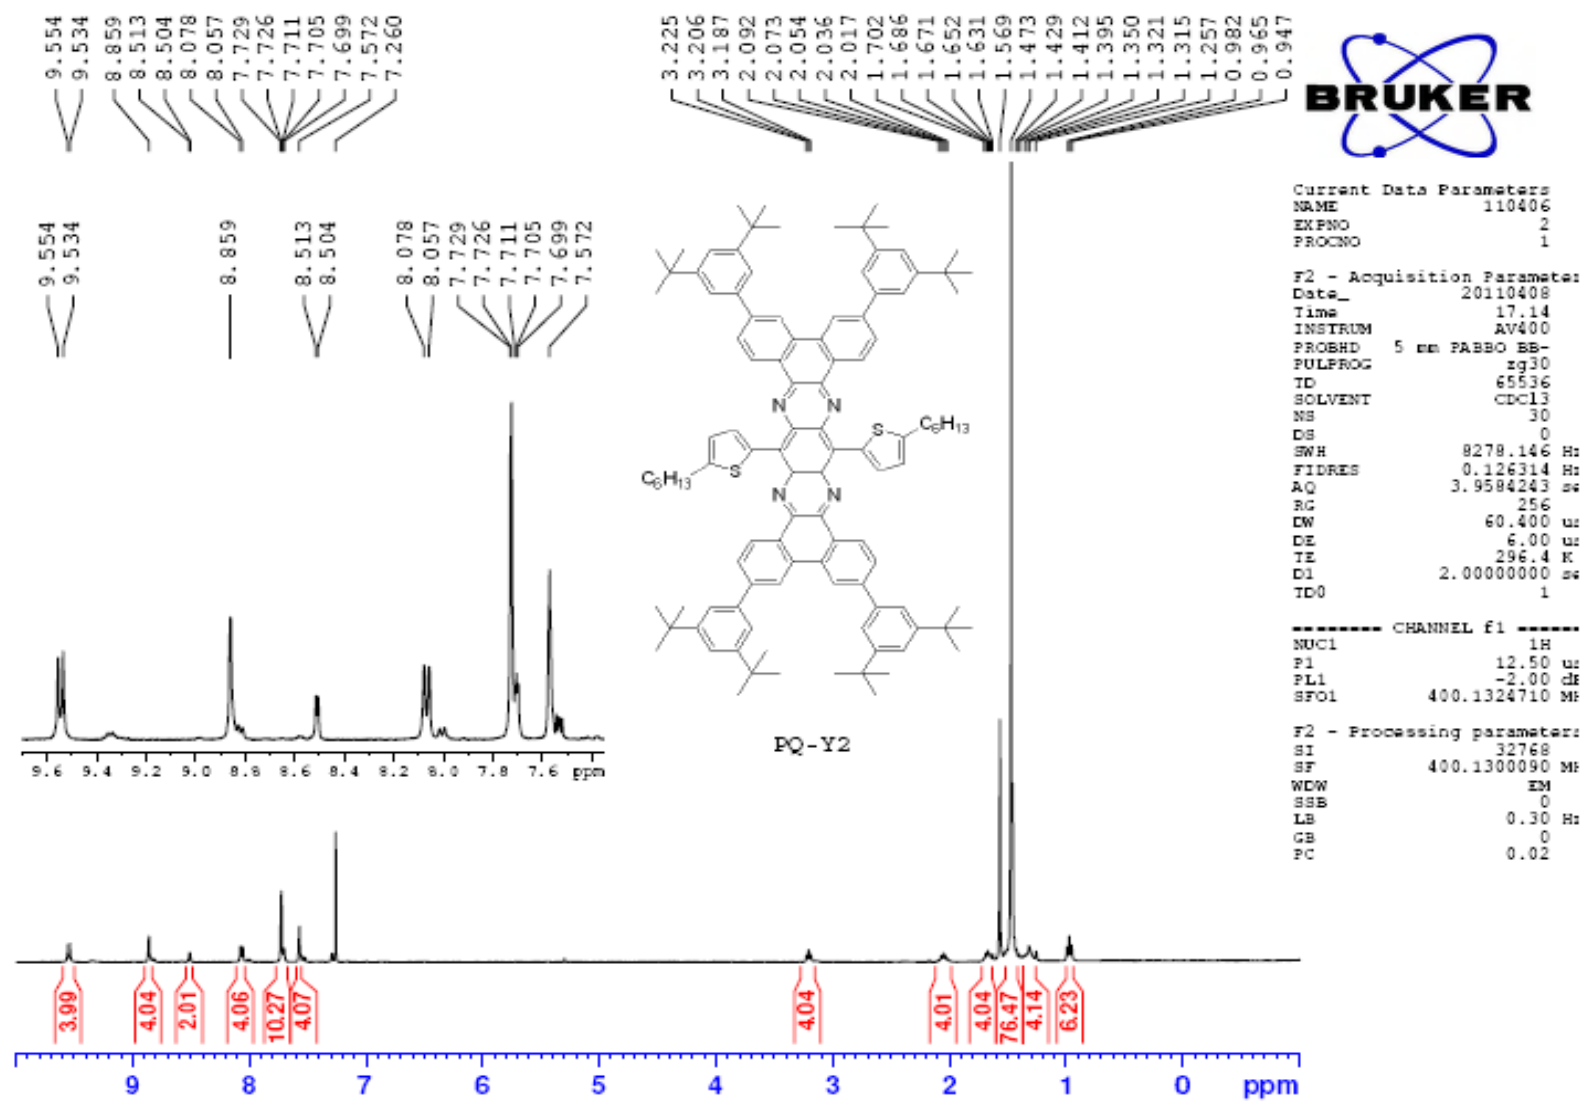

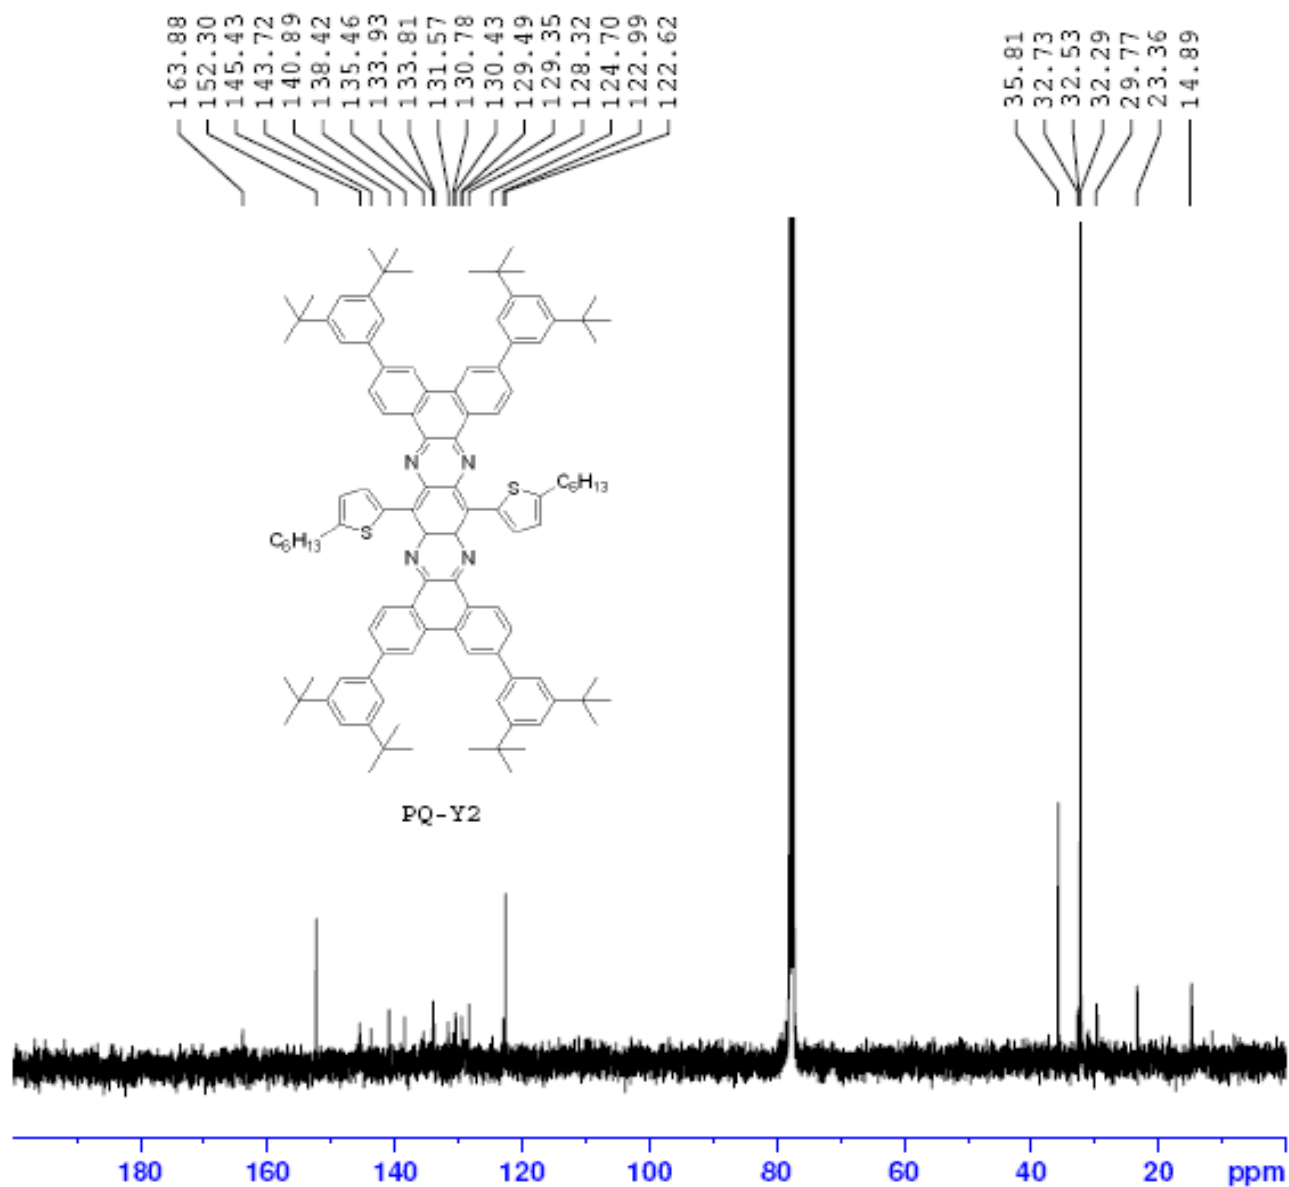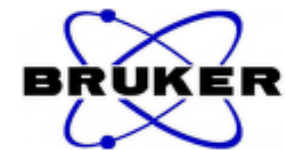

Current Data Parameters  
NAME 110406  
EXPNO 3  
PROCNO 1

F2 - Acquisition Parameters  
Date\_ 20110408  
Time 17.30  
INSTRUM AV400  
PROBHD 5 mm PABBO BB-  
PULPROG zgpg30  
ID 322  
65536  
SOLVENT cdcl3  
NS 2522  
DS 4  
SWH 23980.814 Hz  
FIDRES 0.365918 Hz  
AQ 1.3664756 sec  
RG 4597.6  
DW 20.850 usec  
DE 6.00 usec  
TE 297.6 K  
D1 2.00000000 sec  
d11 0.03000000 sec  
DELTA 1.89999999 sec  
TD0 1

----- CHANNEL f1 -----  
NUC1 13C  
P1 9.00 usec  
PL1 -3.00 dB  
SFO1 100.6228298 MHz

----- CHANNEL f2 -----  
CPDPRG2 waltz16  
NUC2 1H  
PCPD2 90.00 usec  
PL2 -2.00 dB  
PL12 14.12 dB  
PL13 14.00 dB  
SFO2 400.1316005 MHz

F2 - Processing parameters  
SI 32768  
SF 100.6127006 MHz  
WDW EM  
SSB 0  
LB 1.00 Hz  
GB 0  
PC 0.50

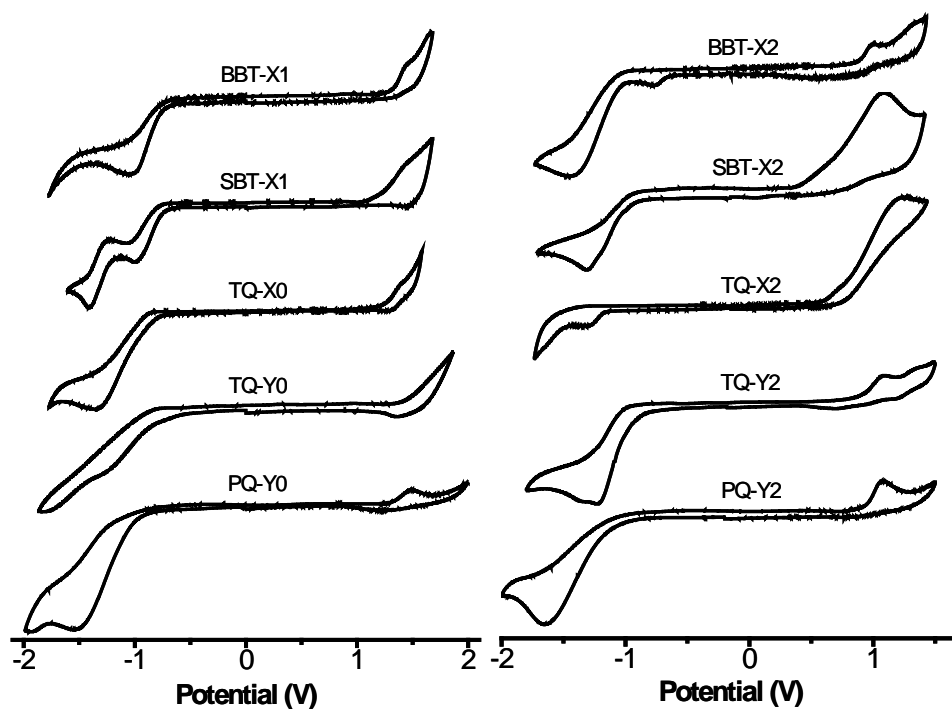

**Figure S1.** Cyclic voltammetry spectra for all newly synthesized BBT, TQ and PQ molecules (PQ-X0 and PQ-X2 can be found in our previous report [4]).

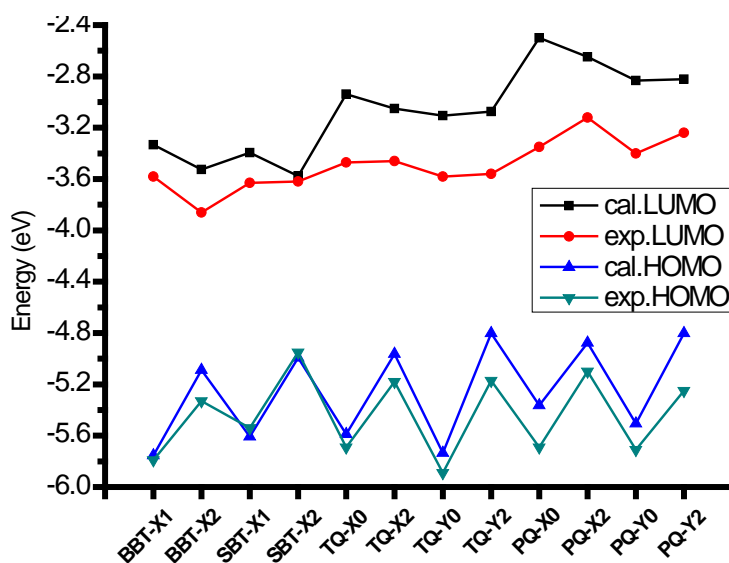

**Figure S2.** The plot of the calculated HOMO and LUMO energy together with the experimental data.



## References

- [1] Becke, A. D., *J. Chem. Phys.* **1993**, *98*, 5648.
- [2] Lee, C.; W. Yang, W.; Parr, R. G., *Phys. Rev. B* **1988**, *37*, 785.
- [3] Refer to the website [http://www.gaussian.com/g\\_tech/g\\_ur/m\\_citation.html](http://www.gaussian.com/g_tech/g_ur/m_citation.html)
- [4] Tam, T. L.; Zhou, F.; Li, H.; Yu Pang, J. C.; Lam, Y. M.; Mhaisalkar, S. G.; Su, H.; Grimsdale, A. C., *J. Mater. Chem.* **2011**, *21*, 17798.
